1                   **Enterotoxigenic *Escherichia coli* display a distinct growth**  
2                   **phase before entry into stationary phase with shifts in**  
3                   **tryptophan- fucose- and putrescine metabolism and**  
4                   **degradation of neurotransmitter precursors.**

7   **Running title:** Transcriptome and metabolome of ETEC during growth

9           Enrique Joffré<sup>1\*</sup>, Xue Xiao<sup>2</sup>, Mário S. P. Correia<sup>3</sup>, Intawat Nookaew<sup>4</sup>, Samantha  
10                    Sasse<sup>3</sup>, Daniel Globisch<sup>3</sup>, Baoli Zhu<sup>2</sup> and Åsa Sjöling<sup>1</sup>

12   <sup>1</sup> Department of Microbiology, Tumor and Cell Biology, Karolinska Institute, Stockholm,  
13   Biomedicum A8, 17165, Stockholm, Sweden

15   <sup>2</sup>CAS Key Laboratory of Pathogenic Microbiology & Immunology, Institute of Microbiology,  
16   Chinese Academy of Sciences, Beijing, 100101, PR China

18   <sup>3</sup>Department of Chemistry - BMC, Science for Life Laboratory, Uppsala University, Box 599,  
19   SE-75124 Uppsala, Sweden.

21   <sup>4</sup> Department of Biomedical Informatics, College of Medicine, University of Arkansas for  
22   Medical Sciences, Little Rock, Arkansas, 72205, USA

24   \*Author correspondence

25   Enrique Joffré

26   Department of Microbiology, Tumor and Cell Biology, Karolinska Institute,  
27   Stockholm, Biomedicum A8, S-17165, Stockholm, Sweden.

28   [Enrique.joffre@ki.se](mailto:Enrique.joffre@ki.se)

30   **Keywords:** ETEC, transcriptomics, metabolomics, diarrheal pathogen, growth  
31   phases, *E. coli*, transient growth phase, neurotransmitter precursors

33

## 34 **Abstract**

35 Enterotoxigenic *Escherichia coli* (ETEC) is a major cause of diarrhea in children and  
36 adults in endemic areas. Gene regulation of ETEC during growth *in vitro* and *in vivo*  
37 needs to be further evaluated, and here we describe the full transcriptome and  
38 metabolome of ETEC during growth from mid-logarithmic growth to stationary phase  
39 in rich medium (LB medium). We identified specific genes and pathways subjected to  
40 rapid transient alterations in gene expression and metabolite production during the  
41 transition between logarithmic to stationary growth. The transient phase during late  
42 exponential growth is different from the subsequent induction of stationary phase-  
43 induced genes, including stress and survival responses as described earlier. The  
44 transient phase was characterized by the repression of genes and metabolites involved  
45 in organic substance transport. Genes involved in fucose and putrescine metabolism  
46 were upregulated, and genes involved in iron transport were repressed. Expression of  
47 toxins and colonization factors were not changed, suggesting retained virulence.  
48 Metabolomic analyses showed that the transient phase was characterized by a drop of  
49 intracellular amino acids, e.g., L-tyrosine, L-tryptophan, L-phenylalanine, L-leucine,  
50 and L-glutamic acid, followed by increased levels at induction of stationary phase. A  
51 pathway enrichment analysis of the entire transcriptome and metabolome showed  
52 activation of pathways involved in the degradation of neurotransmitters aminobutyrate  
53 (GABA) and precursors of 5-hydroxytryptamine (serotonin). This work provides a  
54 comprehensive framework for further studies on transcriptional and metabolic  
55 regulation in pathogenic *E. coli*.

56

## 57 **Importance**

58 We show that *E. coli*, exemplified by the pathogenic subspecies enterotoxigenic *E. coli*  
59 (ETEC), undergoes a stepwise transcriptional and metabolic transition into the  
60 stationary phase. At a specific entry point, *E. coli* induces activation and repression of  
61 specific pathways. This leads to a rapid decrease of intracellular levels of L-tyrosine,  
62 L-tryptophan, L-phenylalanine, L-leucine, and L-glutamic acid due to metabolism into  
63 secondary compounds. The resulting metabolic activity leads to an intense but short  
64 peak of indole production, suggesting that this is the previously described “indole  
65 peak,” rapid decrease of intermediate molecules of bacterial neurotransmitters,  
66 increased putrescine and fucose uptake, increased glutathione levels, and decreased iron

67 uptake. This specific transient shift in gene expression and metabolomics is short-lived  
68 and disappears when bacteria enter the stationary phase. We suggest it mainly prepares  
69 bacteria for ceased growth, but the pathways involved suggest that this transient phase  
70 substantially influences survival and virulence.

71

72

73

74

75

76

77

78

79

80

81

82

83

84

85

86

87

88

89

90

91

92

93

94

95

## 96 **Background**

97 *Escherichia coli* is a facultative anaerobic gram-negative bacterium that normally  
98 inhabits the intestines of mammals and reptiles as a commensal bacterium. Pathogenic  
99 *E. coli* have acquired extrachromosomal genetic properties that enable them to colonize  
100 and adhere to the epithelium, thereby delivering toxins or virulence factors that harm  
101 the host [1]. The virulence factors can either be located on plasmids or inserted in the  
102 chromosomes as pathogenicity islands, and pathogenic *E. coli* can be found in most *E.*  
103 *coli* phylogroups [2-4]. Enterotoxigenic *Escherichia coli* (ETEC) is characterized by  
104 the production of the heat-labile toxin (LT) and/or the heat-stable toxin (ST). In most  
105 cases, each bacterium expresses one to three colonization factors that mediate adhesion  
106 to the epithelium in the small intestine [5, 6]. The toxins and colonization factors of  
107 ETEC are mainly encoded on extrachromosomal plasmids that have been acquired by  
108 horizontal transfer to ancestral commensal *E. coli*. Successful combinations of host and  
109 plasmid may lead to global transmission of virulent clones with optimal colonization  
110 and survival abilities [2, 4].

111

112 The molecular events that govern the virulence of ETEC are less well characterized  
113 than several other intestinal pathogenic *E. coli*. Studies on ETEC have so far focused  
114 on a few global regulators such as Crp, H-NS, and members of the AraC family such  
115 as Rns and CsvR that were shown to regulate the toxins and/or CFs [7-11]. However,  
116 virulence factors are not only the expression of toxins or colonization factors but can  
117 also be expanded to involve the ability to persist host-induced stress or to facilitate  
118 spreading or colonization ability. Studies using real-time PCR, microarrays, and RNA-  
119 Seq have recently begun to elucidate the global and/or specific transcriptional  
120 regulation in ETEC in response to host environmental factors such as bile and glucose  
121 and adhesion to epithelial cells [8, 11-15].

122

123 In this study, we explored the transcriptional and metabolomic profile of two ETEC  
124 clinical isolates belonging to a globally spread lineage during growth from logarithmic  
125 cell division to early stationary phase to elucidate the effect of growth on transcriptomic  
126 profile and virulence gene regulation. We used a multi-omics approach including RNA-  
127 seq and mass spectrometric global metabolomics techniques to analyze the global

128 regulation and provide a framework of *E. coli* genes, transcription factors, and analysis  
129 of metabolites involved in different growth phases in Luria Bertani medium.

130

## 131 Results

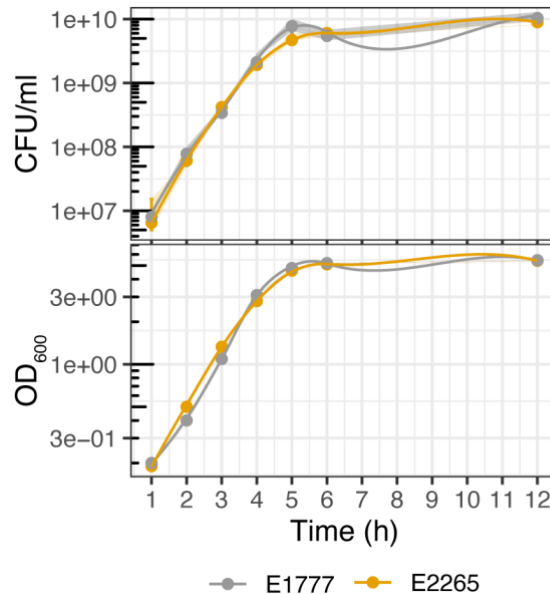

132

133 **Figure 1.** Growth curve of ETEC strains. Total bacterial counts in colony-forming units (CFU/ml) and  
134 optic density (OD<sub>600</sub>) of the ETEC strains E2265 and E1777 in LB media. Samples were measured every  
135 hour for 12 hours.

136

### 137 Expression profiling of two ETEC revealed characteristic transcriptional patterns 138 during transition from log phase to early stationary phase

139 To profile the ETEC transcriptome during bacterial growth transition from mid-  
140 exponential to early stationary phase, we performed RNA-seq analysis on RNA isolated  
141 from two clinical isolates of ETEC (E1777 and E2265) grown in LB media. We  
142 sequenced the transcripts expressed after 3, 4 and 5 hours of growth corresponding to  
143 mid-log phase (3h, OD<sub>600</sub> = 1.1-1.3), late log phase (4h, OD<sub>600</sub> = 2.8-3.1) and early  
144 stationary phase (5h, OD<sub>600</sub> = 4.6-4.8) (Figure 1).

145

146 The two strains express LT STh, CS5+CS6, and belong to the globally distributed L5  
147 ETEC lineage [4]. The time points were chosen to reflect the transition from active  
148 growth to carbon and nutrient starvation, an environment that enteropathogens face in  
149 the human gut and growth in LB [16]. First, Illumina sequence reads were assembled  
150 and assigned as unigene sequences, translated, and compared to protein databases for  
151 annotation. As a result, a total of 4166 unigenes with expression in at least one sample

152 were detected. Next, in order to identify the differentially expressed genes shared by  
153 both isolates E2265 and E1777 and display the dynamic of the transcriptome during the  
154 transition from the log phase (3h) to the early stationary phase (5h), we performed a  
155 differential gene expression analysis by DESeq with a fold-change cutoff of 4 ( $\text{Log}_2$   
156  $>2$ ) and  $p$ -value  $< 0.001$ . Overall, 617 genes (S Table 1, S Table 2) showed a significant  
157 change (up/down) in at least one-time point, and these results were displayed and  
158 clustered in a heatmap in Figure 2. The following comparisons, 3 h vs. 4 h and 3 h vs.  
159 5 h resulted in a number of 486 (257 upregulated and 229 downregulated) and 392 (209  
160 upregulated and 183 downregulated) differentially expressed genes (DEG), respectively  
161 (S Table 2). Thus, a total of 495 filtrated differentially expressed genes (DEG) in at  
162 least one condition in both bacterial transcriptomes were included to perform the *K*-  
163 means clustering analysis of the DEG heatmap (Figure 2 a; S Table 3) resulting in four  
164 clusters of specific gene expression patterns (Cluster I-IV). In parallel, the Short Time-  
165 series Expression Miner (STEM) clustering method [17] was performed using the same  
166 dataset to identify differential gene expression patterns shared among genes with  
167 similar dynamics in transcriptional changes over time (S Figure 1).

168 Thus, STEM (Figure 2 b and S Figure 1) identified eight temporal expression profiles,  
169 of which four enclosed the majority of the genes, of which three (labeled in red, green,  
170 and blue) showed a statistically significant ( $p < 0.05$ ) higher number of genes assigned  
171 using a permutation test. Both methods resulted in four distinctive temporal dynamics  
172 of the transcriptome in response to the transition from log to early stationary phase (S  
173 Table 4). In summary, clusters 1 and II were the largest, enclosing 166 and 110 genes,  
174 respectively. Cluster I showed a decreasing expression towards the entry to the  
175 stationary phase (3 h – 4 h – 5 h), while cluster III showed the opposite trend.  
176 Interestingly, clusters II and IV included 19 and 74 genes, respectively, with a  
177 significant transient down or up-regulation at 4 hours compared to 3 and 5 hours. Thus,  
178 the data indicate that a specific transient phase in gene regulation occurs after 4 hours  
179 and  $\text{OD}_{600}$  around 3 when ETEC enters the late log phase and starts transit into the  
180 stationary phase.

181

182 In order to gain biological insights from the temporal transcriptomic dynamics, we  
183 performed gene ontology (GO) enrichment analysis for biological processes and  
184 metabolic pathways of the significantly expressed genes from each cluster (Figure 2 c;  
185 S Table 5). Significant gene enrichment ( $\text{FDR} < 0.05$ ) of cluster I indicated a notorious

186 downregulation of genes involved in the *de novo* purine biosynthesis pathways such as  
 187 ‘de novo’ IMP biosynthetic processes as well as nitrogen metabolic pathways, and  
 188 protein targeting (intracellular protein transport) when growth slowed down upon entry  
 189 to late log phase and early stationary phase. In contrast, cluster III, which represents a  
 190 progressive transcriptional gene activation towards the stationary phase, was  
 191 significantly enriched in glyoxylate metabolism, TCA cycle, carboxylic acid metabolic  
 192 processes, aerobic respiration, and small molecule metabolism. Organic substance  
 193 transport, which involves the movement of organic substances that contains carbon in,  
 194 out, or within a cell, was solely identified as the most enriched biological process  
 195 among genes of cluster IV. No significant enrichment was identified for Cluster II.  
 196 Even though Clusters II and IV represent a minor proportion of the DEG dataset, they  
 197 exhibited an interesting transient transcriptional response prior to switching into the  
 198 stationary phase.

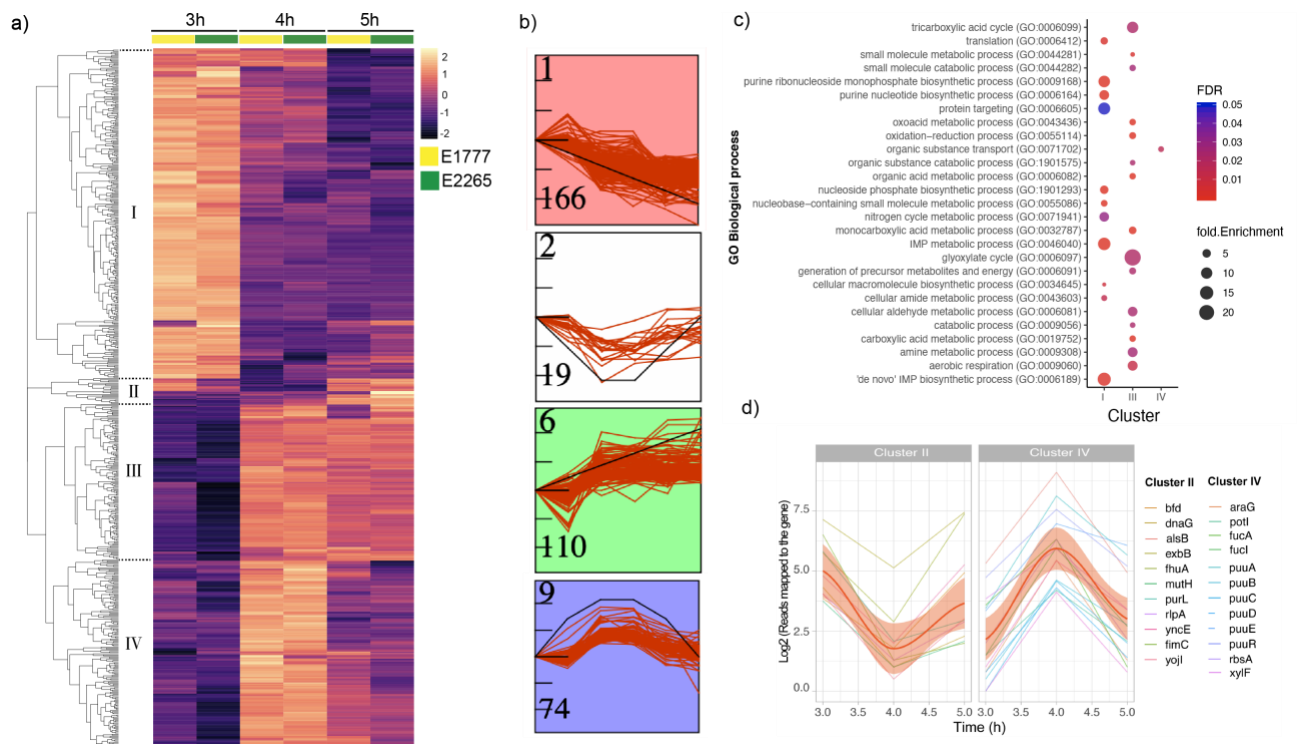

199  
 200 **Figure 2. Transcriptomic response of ETEC during bacterial growth transition from mid-**  
 201 **exponential to early stationary phase.** A) Heatmap of the differential expressions of the two strains  
 202 E1777 and E2265 after 3, 4, and 5 hours of growth in LB medium. *K-mers* analysis indicated 4 main  
 203 clusters (I-IV). B) STEM analysis identifying the most common patterns of gene expression. C) GO  
 204 Biological enrichment analysis of significant genes per cluster and fold enrichment. D) Set of genes with  
 205 transient up or down-regulation.  
 206

207 **Transient transcriptomic activation of putrescine and fucose utilization and**  
208 **reduction of iron transport prior to entry into stationary phase.**

209 The next step is to increase our understanding of the biological role of the transiently  
210 altered genes (4 hours of growth at the beginning of the stationary phase) identified in  
211 clusters II and IV. Reads mapped to the gene of each temporal gene expression were  
212 plotted in Figure 2d. The trendline confirmed the down (cluster II) and up (cluster IV)  
213 regulation of these genes during the transient shift to stationary phase. Among the  
214 activated genes at 4 h, we identified an overrepresentation of genes from the fuc operon,  
215 *i.e.*, *fucI* (L-fucose isomerase) and *fucA* (L-fucose 1-phosphate aldolase) and *fucU* (L-  
216 fucose mutarotase) with an approximately 6-fold increase in expression. Another set of  
217 genes involved in the exploitation of alternative nutrient sources was the putrescine  
218 pathway. Like the fucose operon, the Puu-operon (putrescine utilization pathway)  
219 genes that degrade putrescine to GABA via  $\gamma$ -glutamylated intermediates were highly  
220 activated at 4 h. Genes involved in the putrescine uptake system, *i.e.*, *potI* and *ydcU*  
221 showed the same pattern. Another gene included in this cluster was *tnaA*, which  
222 encodes tryptophanase, responsible for indole production from L-tryptophan. Its  
223 expression was activated 20-fold at 4 h compared to the mid-log growth phase at 3 h  
224 and reduced 6-fold at 5h (S Table 3). In addition, increased expression of the fad-operon  
225 (*fadH*, *FadM*) and the *dpp*-operon in charge of dipeptide transport were evident.  
226 Downregulation of genes in cluster II included *exbB* and *fhuA* involved in siderophore-  
227 mediated iron transport, *yncE*, a DNA binding protein involved in iron metabolism, and  
228 *bfd* bacterioferritin-associated ferredoxin; hence cluster II suggests that a rapid  
229 downregulation of genes involved in iron metabolism occurs transiently before entry  
230 into early stationary phase.

231

232 **Expression of ETEC virulence factors is slightly higher during exponential growth**

233 Both strains analyzed in this study expressed genes encoding the enterotoxins: *eltAB*  
234 (LT) and *estA* (STh), and colonization factor operons: *csfABCDEF* (CS5) and *cssABCD*  
235 (CS6) [18]. The transcriptome data showed that *eltAB* expression was higher than *estA*  
236 at all three-time points. In comparison with *estA* expression, *eltAB* was 3-4-fold higher  
237 at 3 hours and 2-4-fold and 2-fold at 4 and 5 hours, respectively. Expression of *eltAB*  
238 and the CS5 encoding *cfs*-operon, *estA*, and the CS6 had a trend of gradual  
239 downregulation over time (S Table 4). The expression patterns were similar between



240 the strains. Although the expression levels were not significantly changed in this study,  
241 the findings are confirmed by our previous work [8]. Genome analysis showed that both  
242 strains also express additional virulence genes: *cexE*, *clyA*, *eatA*, *ecpA*, and *fimH* [18].  
243 These genes were not significantly changed.

244

#### 245 **Global view of the intracellular and secreted metabolome of ETEC growth phases**

246 Since our transcriptomic data provided a framework of how metabolic pathways were  
247 altered during the transition from freely available nutrients to a more restricted  
248 environment, we wanted to characterize the impact of nutrient depletion on the bacterial  
249 metabolome. We collected pellets (intracellular metabolites) and supernatants (secreted  
250 metabolites) of E2265 and E1777 bacteria at 3, 4, and 5 hours of growth in LB broth  
251 medium and performed a nontargeted GC-MS-based metabolomics approach.  
252 Approximately 2000 putative intracellular and secreted metabolites were detected in  
253 both isolates, of which 288 metabolites were successfully identified (S Table 6).  
254 Principal component analysis (PCA) (Figure 3a) of all samples revealed a profound  
255 clustering of samples from the intracellular and secreted metabolomes. The analysis  
256 also indicated that the intracellular metabolomes of both E2265 and E1777 are more  
257 similar than their respective secreted metabolome. The PCA did not show any variation  
258 between metabolomes of the strains per time point (Figure 3a); however, the  
259 hierarchical clustering heatmap showed changes in the abundance of several  
260 metabolites along with the time points (S Figure 2).

261

#### 262 ***Intracellular and secreted metabolome show unique metabolomic shifts***

263 Since we are interested in studying the differences in the metabolome during bacterial  
264 growth transition mid-exponential to early stationary phase, we used multiple t-tests to  
265 compare the metabolite abundance between two time points, *i.e.*, 3 h versus 4 h or 3 h  
266 versus 5 h (S Table 7, S Table 8). The threshold for significant changes was  $|\log_2$  fold  
267 change  $> \log_2 2$ ;  $P_{adj} < 0.05$ ). As shown in Table 1, Figure 3 b, and S Figure 3, 35  
268 metabolites significantly changed in their intracellular and/or extracellular  
269 concentration at any time point. Specifically, 20 intracellular and 12 secreted  
270 metabolites were significantly altered.

271 To characterize the chemical diversity of the intracellular and secreted ETEC  
272 metabolomes and further explore the metabolic changes between the intracellular and  
273 secreted ETEC metabolomes across the time points, the significant metabolites were

274 classified according to chemical classes (Human Metabolome DB; [www.hmdb.ca](http://www.hmdb.ca)) and  
 275 a hierarchical clustering heatmap based on the metabolite relative abundances was  
 276 generated. Ten and five metabolite classes were included in the intracellular and  
 277 secreted metabolome, respectively. The most common class of metabolites were amino  
 278 acids and peptides, as well as downstream catabolism metabolites. The metabolic  
 279 profile changes illustrated in the heatmap of Figure 3c indicated remarkable differences  
 280 in the metabolite abundance between ETEC metabolomes and some differences in the  
 281 metabolic profile between ETEC strains. For instance, betaine and the fatty acid 5-  
 282 aminopentanoic acid were only detected in E2265, and the amino acid *N*-methyl-L-  
 283 glutamic acid only in E1777 (Figure 3c).

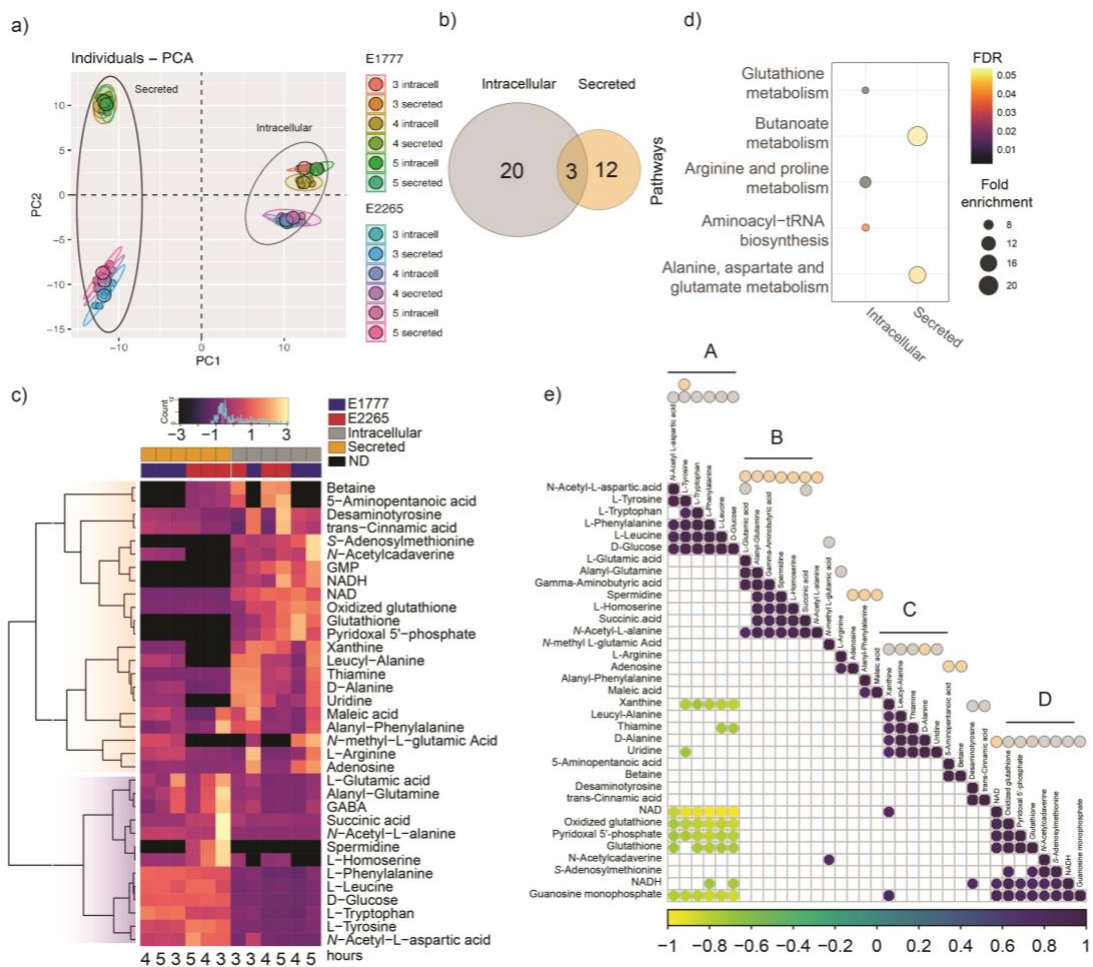

284  
 285 **Figure 3. Intracellular and Secreted profile of the metabolic response to ETEC during bacterial**  
 286 **growth transition from mid-exponential to early stationary phase.** A) PCA plot generated from all  
 287 metabolites of different samples. B) Venn diagrams of number of significant ( $p < 0.01$   $-2 >$   
 288  $\text{Log}_2\text{Foldchange} < 2$ ) found in the bacteria (intracellular) or medium (secreted). C) Heatmap  
 289 representation of the 35 differentially changed metabolites at any time point. D) Pathway enrichment  
 290 analysis of the intracellular and secreted significant metabolites. Non-significant pathways were colored  
 291 gray. E) Metabolite-metabolite correlation analysis shows positive correlations in dark purple and

292 negative correlations in yellow. Secreted and intracellular metabolites were marked with orange and gray  
293 dots, respectively.

294 Two main clusters of metabolite abundance patterns were identified: the first cluster  
295 included a diverse set of metabolites with higher intracellular concentrations or absence  
296 of secretion. For instance, *S*-adenosylmethionine, *N*-acetylcadaverine, GMP, NADH,  
297 glutathione, and pyridoxal 5'-phosphate (PLP, known as the catalytically active form  
298 of vitamin B<sub>6</sub>) were not secreted at any time point by the two strains.

299

300 In the second cluster with higher levels of secreted metabolites than intracellular levels,  
301 we found most of the amino acids identified in this dataset and glucose and succinic  
302 acid. The amine spermidine was only detected in the E2265 supernatant, whereas the  
303 amino acid L-homoserine was secreted at higher levels by E2265 than E1777, where  
304 the metabolite was absent intracellularly (Figure 3c). Again, these data indicated that  
305 although both ETEC strains are genetically very closely related, their physiology could  
306 vary. The clustering patterns of samples per time point also confirmed significant  
307 differences in metabolites abundance over time.

308

309 **Table 1. Summary of significantly altered intracellular and secreted metabolites of ETEC.**

310 Metabolites were classified based on the biochemical structure and in which metabolic pathways play a  
311 role. Metabolite abundance is presented in fold change against 3 h. Values in bold represent  $-2 >$   
312  $\text{Log}_2\text{Foldchange} < 2$  and underlined were statistically significant  $\text{Padj} < 0.05$ .

| Metabolite               | Classification           | HMDB ID     | Intracellular |         |         |         | Secreted |         |         |         | Aminoacyl-tRNA biosynthesis | Butanoate metabolism | Ala, Asp. and Glut metabolism | Arg and Pro metabolism | Glycolysis / Gluconeogenesis | Glutathione metabolism | Purine metabolism | Gly. Ser. and Thr metabolism | Methano metabolism | Nicotinamide metabolism | Vitamin B6 metabolism | Thiamine metabolism | phenylalanine metabolism | Pyrimidine metabolism | Muropptide degradation | Peptidoglycan biosynthesis | NF |
|--------------------------|--------------------------|-------------|---------------|---------|---------|---------|----------|---------|---------|---------|-----------------------------|----------------------|-------------------------------|------------------------|------------------------------|------------------------|-------------------|------------------------------|--------------------|-------------------------|-----------------------|---------------------|--------------------------|-----------------------|------------------------|----------------------------|----|
|                          |                          |             | E1777         |         | E2265   |         | E1777    |         | E2265   |         |                             |                      |                               |                        |                              |                        |                   |                              |                    |                         |                       |                     |                          |                       |                        |                            |    |
|                          |                          |             | 3h v 4h       | 3h v 5h | 3h v 4h | 3h v 5h | 3h v 4h  | 3h v 5h | 3h v 4h | 3h v 5h |                             |                      |                               |                        |                              |                        |                   |                              |                    |                         |                       |                     |                          |                       |                        |                            |    |
| L-Glutamic acid          | Amino acids and peptides | HMDB0000148 | -2.24         | -0.73   | -1.76   | -1.15   | -1.59    | -2.19   | -0.87   | -2.46   |                             |                      |                               |                        |                              |                        |                   |                              |                    |                         |                       |                     |                          |                       |                        |                            |    |
| L-Tyrosine               | Amino acids and peptides | HMDB0000158 | -2.47         | -0.11   | -1.58   | -0.99   | -0.05    | -0.15   | 0.21    | 0.25    |                             |                      |                               |                        |                              |                        |                   |                              |                    |                         |                       |                     |                          |                       |                        |                            |    |
| Succinic acid            | TCA acids                | HMDB0000254 | -3.37         | -0.36   | -2.01   | -2.26   | -0.51    | -0.43   | -2.43   | -2.47   |                             |                      |                               |                        |                              |                        |                   |                              |                    |                         |                       |                     |                          |                       |                        |                            |    |
| L-Arginine               | Amino acids and peptides | HMDB0000517 | -3.09         | -0.48   | -2.37   | -1.79   | -0.26    | -0.03   | 0.15    | 0.33    |                             |                      |                               |                        |                              |                        |                   |                              |                    |                         |                       |                     |                          |                       |                        |                            |    |
| L-Leucine                | Amino acids and peptides | HMDB0000687 | -2.44         | -0.10   | -0.41   | 0.27    | 0.19     | 0.21    | 0.43    | 0.45    |                             |                      |                               |                        |                              |                        |                   |                              |                    |                         |                       |                     |                          |                       |                        |                            |    |
| L-Phenylalanine          | Amino acids and peptides | HMDB0000159 | -2.13         | -0.03   | -1.27   | -0.79   | 0.04     | -0.02   | 0.01    | 0.09    |                             |                      |                               |                        |                              |                        |                   |                              |                    |                         |                       |                     |                          |                       |                        |                            |    |
| L-Tryptophan             | Amino acids and peptides | HMDB0000929 | -2.76         | -0.04   | -1.48   | -1.12   | 0.11     | -0.04   | -0.10   | -0.06   |                             |                      |                               |                        |                              |                        |                   |                              |                    |                         |                       |                     |                          |                       |                        |                            |    |
| N-Acetyl-L-aspartic acid | Amino acids and peptides | HMDB0000812 | -3.04         | -3.30   | 0.59    | -0.17   | 0.01     | 0.12    | 0.02    | 0.43    |                             |                      |                               |                        |                              |                        |                   |                              |                    |                         |                       |                     |                          |                       |                        |                            |    |
| S-Adenosylmethionine     | Glycosyl compounds       | HMDB0001185 | 1.46          | 2.50    | -0.05   | 0.49    | 0.00     | 0.00    | 0.00    | 0.00    |                             |                      |                               |                        |                              |                        |                   |                              |                    |                         |                       |                     |                          |                       |                        |                            |    |
| D-Glucose                | Monosaccharides          | HMDB0000122 | -3.27         | -0.35   | -1.94   | -1.40   | -0.03    | 0.01    | 0.07    | 0.02    |                             |                      |                               |                        |                              |                        |                   |                              |                    |                         |                       |                     |                          |                       |                        |                            |    |
| Glutathione              | Amino acids and peptides | HMDB0000125 | 3.02          | 2.32    | 3.56    | 4.27    | 0.00     | 0.00    | 0.00    | 0.00    |                             |                      |                               |                        |                              |                        |                   |                              |                    |                         |                       |                     |                          |                       |                        |                            |    |
| Oxidized glutathione     | Amino acids and peptides | HMDB0003337 | 0.87          | 0.71    | 1.69    | 2.39    | 0.40     | 0.48    | 1.17    | 1.29    |                             |                      |                               |                        |                              |                        |                   |                              |                    |                         |                       |                     |                          |                       |                        |                            |    |
| GMP                      | Purines                  | HMDB0001397 | 0.23          | 1.11    | 1.60    | 2.13    | 0.00     | 0.00    | 0.00    | 0.00    |                             |                      |                               |                        |                              |                        |                   |                              |                    |                         |                       |                     |                          |                       |                        |                            |    |
| Xanthine                 | Purines                  | HMDB0000292 | -2.86         | -0.03   | 1.14    | 0.76    | 0.06     | 0.11    | 0       | 0       |                             |                      |                               |                        |                              |                        |                   |                              |                    |                         |                       |                     |                          |                       |                        |                            |    |
| N-methyl-L-glutamic Acid | Amino acids and peptides | HMDB0062660 | 2.02          | 2.48    | 0.00    | 0.00    | 0.63     | 0.58    | 0.00    | 0.00    |                             |                      |                               |                        |                              |                        |                   |                              |                    |                         |                       |                     |                          |                       |                        |                            |    |
| NAD                      | Nicotinamides            | HMDB0000902 | 0.48          | -0.05   | 0.69    | 0.62    | 0.01     | 1.14    | 3.17    | 2.59    |                             |                      |                               |                        |                              |                        |                   |                              |                    |                         |                       |                     |                          |                       |                        |                            |    |
| Pyridoxal 5'-phosphate   | Pyridine carboxaldehydes | HMDB0001491 | 2.21          | 1.06    | 2.71    | 3.33    | 0.00     | 0.00    | 0.00    | 0.00    |                             |                      |                               |                        |                              |                        |                   |                              |                    |                         |                       |                     |                          |                       |                        |                            |    |
| Thiamine                 | Pyrimidines              | HMDB0000235 | -2.46         | -0.23   | -1.29   | -0.99   | 0.07     | 0.06    | 0.09    | 0.08    |                             |                      |                               |                        |                              |                        |                   |                              |                    |                         |                       |                     |                          |                       |                        |                            |    |
| trans-Cinnamic acid      | Cinnamic acids           | HMDB0000930 | -0.52         | -0.72   | 0.15    | 2.19    | 0.16     | 0.05    | -0.03   | 0.28    |                             |                      |                               |                        |                              |                        |                   |                              |                    |                         |                       |                     |                          |                       |                        |                            |    |
| Uridine                  | Pyrimidines              | HMDB0000296 | -2.02         | -0.48   | -0.91   | -2.35   | 0.03     | 0.02    | 0.00    | 0.00    |                             |                      |                               |                        |                              |                        |                   |                              |                    |                         |                       |                     |                          |                       |                        |                            |    |
| Leucyl-Alanine           | Amino acids and peptides | HMDB0028922 | -3.14         | 0.02    | -1.21   | -1.27   | 0.57     | 0.61    | 0       | 0       |                             |                      |                               |                        |                              |                        |                   |                              |                    |                         |                       |                     |                          |                       |                        |                            |    |
| N-Acetylcadaverine       | Carboxylic acids         | HMDB0002284 | 0.30          | 2.63    | 1.25    | 3.11    | 1.68     | 0.76    | 0.00    | 0.00    |                             |                      |                               |                        |                              |                        |                   |                              |                    |                         |                       |                     |                          |                       |                        |                            |    |
| Desaminotyrosine         | Phenylpropanoids         | HMDB0002199 | -0.49         | -0.64   | 0.31    | 2.50    | 0.29     | 0.17    | 0.01    | 0.39    |                             |                      |                               |                        |                              |                        |                   |                              |                    |                         |                       |                     |                          |                       |                        |                            |    |
| 5-Aminopentanoic acid    | Fatty acids              | HMDB0000335 | 0             | 0       | 0.71    | 1.10    | 0        | 0       | -0.85   | -2.35   |                             |                      |                               |                        |                              |                        |                   |                              |                    |                         |                       |                     |                          |                       |                        |                            |    |
| Adenosine                | Purines                  | HMDB0000050 | -0.49         | -0.03   | -0.31   | -0.82   | -0.99    | 0.03    | -2.51   | -3.14   |                             |                      |                               |                        |                              |                        |                   |                              |                    |                         |                       |                     |                          |                       |                        |                            |    |
| Alanyl-Phenylalanine     | Amino acids and peptides | HMDB0028694 | -4.19         | -0.06   | -2.01   | -2.00   | -2.57    | -1.49   | -3.32   | -4.60   |                             |                      |                               |                        |                              |                        |                   |                              |                    |                         |                       |                     |                          |                       |                        |                            |    |
| Betaine                  | Amino acids and peptides | HMDB0000043 | 0             | 0       | 0.17    | 0.09    | 0        | 0       | -1.28   | -2.20   |                             |                      |                               |                        |                              |                        |                   |                              |                    |                         |                       |                     |                          |                       |                        |                            |    |
| L-Homoserine             | Amino acids and peptides | HMDB0000719 | 0             | 0       | -2.70   | -1.72   | -0.29    | 0.00    | -0.69   | -2.20   |                             |                      |                               |                        |                              |                        |                   |                              |                    |                         |                       |                     |                          |                       |                        |                            |    |
| Alanyl-Glutamine         | Amino acids and peptides | HMDB0028685 | -3.62         | -0.26   | -2.45   | -2.43   | -2.14    | -1.12   | -1.13   | -3.02   |                             |                      |                               |                        |                              |                        |                   |                              |                    |                         |                       |                     |                          |                       |                        |                            |    |
| D-Alanine                | Amino acids and peptides | HMDB0001310 | -2.79         | -0.40   | -1.24   | -1.40   | -0.32    | -0.02   | -1.19   | -3.05   |                             |                      |                               |                        |                              |                        |                   |                              |                    |                         |                       |                     |                          |                       |                        |                            |    |
| Spermidine               | Amines                   | HMDB0001257 | 0             | 0       | 0       | 0       | 0        | 0       | -0.81   | -2.21   |                             |                      |                               |                        |                              |                        |                   |                              |                    |                         |                       |                     |                          |                       |                        |                            |    |
| GABA                     | Amino acids and peptides | HMDB0000112 | -2.35         | -0.24   | -1.77   | -1.31   | -2.90    | -1.35   | -0.82   | -2.29   |                             |                      |                               |                        |                              |                        |                   |                              |                    |                         |                       |                     |                          |                       |                        |                            |    |
| Maleic acid              | Fatty acids              | HMDB0000176 | -2.52         | -0.71   | -1.20   | -0.94   | 0.34     | 0.52    | -3.32   | -3.40   |                             |                      |                               |                        |                              |                        |                   |                              |                    |                         |                       |                     |                          |                       |                        |                            |    |
| N-Acetyl-L-alanine       | Amino acids and peptides | HMDB0000766 | 0             | 0       | 0       | 0       | -0.07    | 0.02    | -2.71   | -2.69   |                             |                      |                               |                        |                              |                        |                   |                              |                    |                         |                       |                     |                          |                       |                        |                            |    |
| NADH                     | Nicotinamides            | HMDB0001487 | 0.86          | 1.66    | -0.67   | 2.23    | 0.00     | 0.00    | 0.00    | 0.00    |                             |                      |                               |                        |                              |                        |                   |                              |                    |                         |                       |                     |                          |                       |                        |                            |    |

313

314 A pathway enrichment analysis of significantly altered metabolites discovered general  
 315 metabolic differences between both fractions. As is shown in Figure 3d, three KEGG  
 316 pathways were differentially enriched (FDR < 0.05), and several other pathways were  
 317 associated with the significant metabolites (Table 1). The intracellular metabolites with  
 318 significant differences over the timepoints were enriched in the aminoacyl-tRNA  
 319 biosynthesis pathway, including L-tyrosine, L-tryptophan, L-phenylalanine, L-leucine,  
 320 and L-glutamic acid. These metabolites showed significantly decreased levels at 4  
 321 hours which were restored in E1777 at 5 hours but remained low in E2265. The  
 322 intracellular glutathione levels increased 10-fold at 4 h compared to 3 h and remained  
 323 high at 5 h. On the other hand, the pathways responsible for butanoate metabolism,  
 324 alanine, aspartate, and glutamate metabolism were significantly enriched among  
 325 secreted metabolites (Figure 4 c and S Table 9).

326 The butanoate metabolism pathway included the bacterial neurotransmitter GABA, L-  
 327 glutamate, succinic acid, and maleic acid, and they were mainly secreted at 3 hours.  
 328 These metabolites were found in lower concentrations in comparison with metabolites  
 329 of the aminoacyl-tRNA biosynthesis pathway.

330

331 In order to investigate whether there were metabolite-metabolite correlations across the  
 332 metabolomes, we calculated the Pearson correlation coefficients. We wanted to identify

333 the strongest correlations, and a total of 110 pairwise differentially significant  
334 correlations ( $P < 0.001$ ) were found, of which 74 were positive and 36 negative  
335 metabolite-metabolite correlations. Most of these correlations were consistent with the  
336 heatmap clustering; however, 4 sets of tightly correlated metabolite-metabolite  
337 interaction were identified. As seen in Figure 3 e (S Table 10), all 4 grouped pairwise  
338 metabolites positively correlated ( $r < 0.8$ ). Most of the amino acid metabolites were  
339 clustered in groups A and B, while the C and D groups included more diverse classes  
340 of metabolites. The positive correlations emphasized their close biochemical  
341 relatedness or overlapped roles among catabolic pathways. In contrast, metabolite-  
342 metabolite correlations from A and D as well as xanthine, thiamine, and uridine from  
343 the nucleotide metabolisms and A correlated negatively ( $r < -0.6$ ).

344 Overall, the metabolome analysis of ETEC revealed distinctive differences in the  
345 metabolic composition of the intracellular and external environment of the bacteria,  
346 mainly characterized by the secretion or availability of large amounts of essential amino  
347 acids, intermediates, and derived molecules such as GABA. In contrast, the intracellular  
348 environment was characterized by a transient drop of amino acids at 4 hours of growth,  
349 and glutathione redox-regulation was implicated in the adaptation to stationary phase  
350 as reduced L-glutathione was increased 10-fold intracellularly.

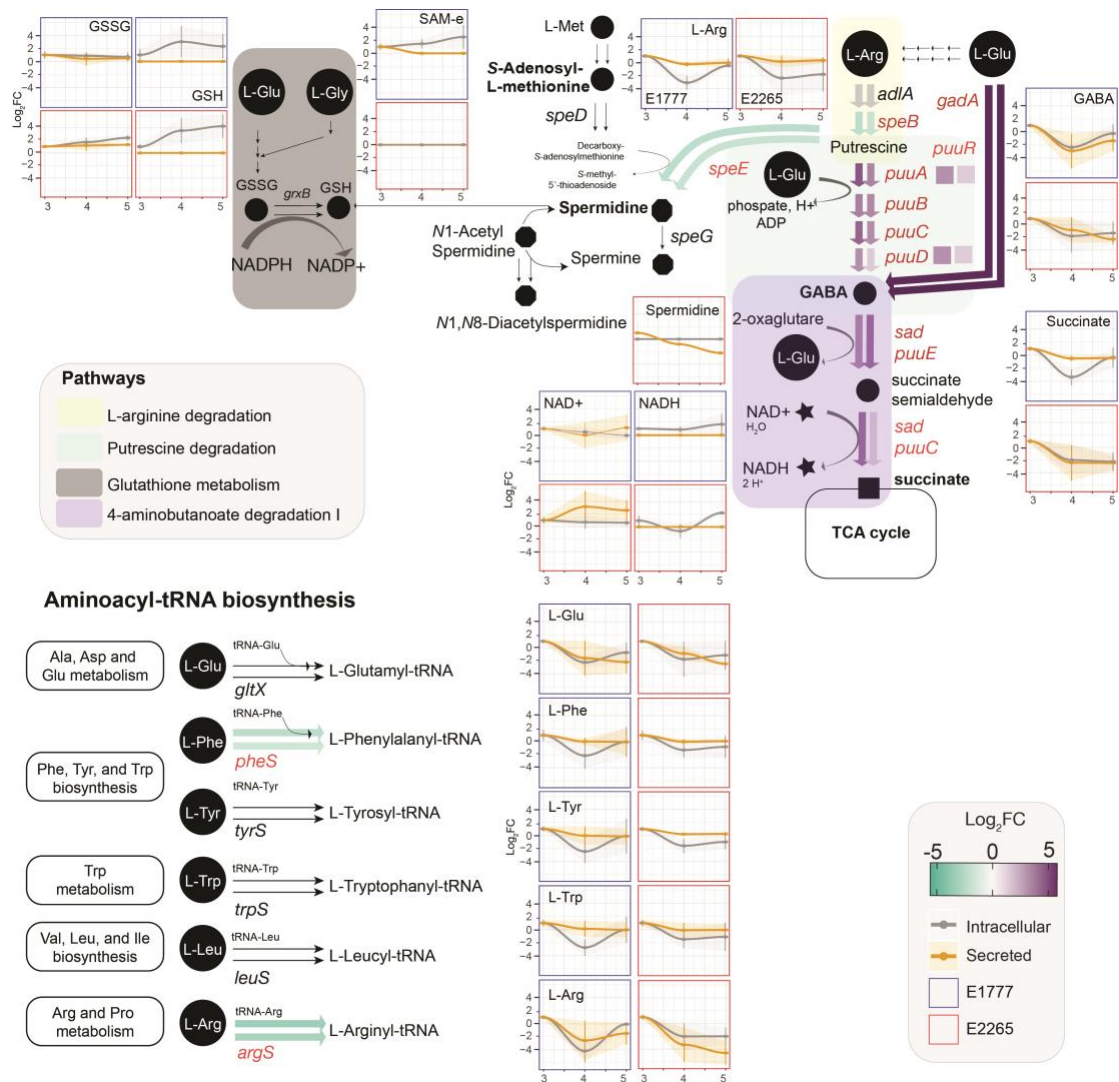

351

352

**Figure 4. Transcriptomic and metabolic modulation of 4-butanoate degradation, related pathways, and Aminoacyl-tRNA biosynthesis of ETEC during growth.** Circles are metabolites, and arrows are reactions. Verified metabolites are labeled in bold (S Table 12). The color of the width arrows indicates the levels of gene expression represented in the fold-change. The first and second arrows represent the DEG between 3 vs. 4 h and 3 vs. 5h. Data of the concentration of significant metabolites are represented in the serial charts. The metabolite concentration is adjusted to 3 h, and the data is presented in fold-change $\pm$ SD.

359

### 360 Transcriptome and metabolome integration

361

Next, we combined the significant data from the transcriptomic analysis and metabolomics and mapped it into super pathways, including L-arginine, 4-aminobutanoate, and putrescine degradation (Figure 4 and S Table 11). This pathway uses L-arginine as a carbon source and degrades it to succinate for the TCA. Thus, at 4 hours, the concentrations of L-arginine, GABA -the intermediate molecule in the polyamine putrescine degradation, and succinate had a significant drop of its

366

367 concentration by 5-fold in both intracellular and extracellular environments remained  
368 slightly lower towards the entry of the stationary phase. This was also consistent with  
369 a significant transient upregulation of all *puu* operon genes at 4 hours. The expression  
370 levels of *puuR*, the main repressor that regulates the intracellular putrescine  
371 concentrations by repressing several genes of putrescine utilization and transport, had  
372 the highest expression at 4 h. Glutamate and GABA are involved in the acid resistance  
373 system 2 (AR2), which enteric bacteria use to survive acidic conditions [19]. A  
374 significant increase in the expression of *gadA* and the glutamate decarboxylase at 4  
375 hours suggests that bacteria initially convert L-glutamate to GABA, which is then  
376 subsequently degraded since levels of glutamate, GABA, and succinate all rapidly  
377 decrease intracellularly at 4 hours compared to 3 hours.

378

379 The degradation of putrescine can also form other polyamines such as spermidine and  
380 spermine through L-methionine degradation. Spermine was found in large  
381 concentrations at 3h and drastically decreased over time. The S-Adenosyl-L-  
382 methionine, synthesized from the essential amino acid L-methionine was found in low  
383 concentration at 4h and 5h (only in E1777) and subsequently converted by the  
384 spermidine synthase (encoded by *speE*) to spermidine and later spermine, which was  
385 found in lower concentration in the extracellular environment. Other acetylated  
386 polyamines derived from spermidine such as *N*<sub>1</sub>-acetylspermidine and *N*<sub>1</sub>, *N*<sub>8</sub>  
387 diacetylspermidine were detected but not significantly changed over time. They  
388 displayed mixed patterns with increasing concentrations in both supernatant and  
389 intracellular fractions. Acetylation converts the polyamines to a physiologically inert  
390 form to protect against polyamine toxicity and is mainly excreted from the cell. On the  
391 other hand, spermidine can conjugate with thiol glutathione which plays a role in  
392 detoxifying xenobiotics and reactive oxygen species. This thiol was detected at  
393 increased concentrations over time intracellularly.

394

## 395 **Discussion**

396 Growth in Luria Bertani (LB) broth is commonly used to analyze bacterial properties.  
397 Although most natural habitats of prokaryotes do not resemble the nutrients in LB, the  
398 transition to more nutrient-depleted conditions, *i.e.*, the stationary phase when growth  
399 ceases, is a common phenomenon in nature. We analyzed the transcriptome of two  
400 ETEC strains during the transition from late exponential phase/early stationary phase

401 to stationary phase to get a comprehensive view of the regulatory and metabolic  
402 pathways involved in ETEC and *E. coli* growth in LB. Our results indicated several  
403 distinct steps during the transition into the stationary phase in support of previous  
404 studies [20]. Specifically, we identified an interesting transient phase at  $OD_{600} = 3$  at  
405 the immediate onset of stationary phase characterized by decreased gene expression of  
406 genes involved in iron uptake and more than 10-fold upregulation of operons involved  
407 in, e.g., dipeptide transport, fucose, and putrescine utilization and indole production.  
408 Furthermore, integration of the transcriptome with metabolome analyses highlighted  
409 the L-arginine, 4-aminobutanoate, and putrescine degradation pathways forcefully  
410 induced at the onset of the stationary phase.

411

412 Our results suggested that the transient phase when ETEC/*E. coli* is preparing for  
413 stationary phase is characterized by a temporal reduction in iron uptake. Interestingly,  
414 a similar response has been reported in the transition phase between the log and  
415 stationary phase for *Helicobacter pylori* [21], suggesting this phase alteration and its  
416 characteristics occur in several bacterial species. Metal ions such as iron are essential  
417 for bacteria but, at the same time, extremely toxic. Iron ions in oxidation state II (ferrous  
418  $Fe^{2+}$ ) iron are more bioavailable than ferric ( $Fe^{3+}$ ) ions in oxidation state III but more  
419 toxic since they may form hydroxyl radicals through the Fenton reaction. Our results  
420 demonstrated that, e.g., *fecA* and *fhuA* related to iron uptake and transport of ferrous  
421 ion and ferric ion were transiently downregulated during entry into stationary phase.  
422 This may have implications in ensuring iron homeostasis in an iron-deficient  
423 environment such as the gastrointestinal tract [22-24].

424

425 Transcriptome analysis also indicated increased fucose metabolism at the onset of  
426 stationary phase at 4h followed by down-regulated at 5h. Fucose is an abundant mucus-  
427 derived metabolite in the intestine generated by commensal bacteria [25]. The most  
428 common commensal bacterium in the gut is *Bacteroides thetaiotaomicron*, and some  
429 *E. coli* can utilize fucose as a carbon source [26]. We confirmed that E2265 used in this  
430 study could metabolize L-fucose in a phenotypic assay, but interestingly this trait was  
431 not conserved over all ETEC lineages. Several studies have shown the important role  
432 of fucose in virulence. For example, in *Salmonella* Typhimurium, *fucI* was significantly  
433 upregulated one day after infection in germ-free mice colonized by *Bacteroides*  
434 *thetatiotaomicron*, and the respective mutant had decreased competitiveness *in vivo*



435 [27]. Another example of fucose modulating the virulence is EHEC, which harbors a  
436 pathogenicity island LEE containing a two-complement-system (TCS) capable of  
437 sensing fucose and transcribing the pathogenicity island LEE [28]. In EHEC, it has also  
438 been demonstrated that fucose is important for colonization, suggesting that bacterial  
439 pathogens take advantage of using unexploited sugars by commensal bacteria [29].  
440 Hence the induction of fucose utilization might promote colonization of the mucosa of  
441 bacteria in the early stationary growth phase. The fact that E2265 belongs to the  
442 commonly isolated and globally spread clonal lineage 5 [4] might implicate that fucose  
443 metabolism is important for virulence in certain ETEC lineages.

444

445 Pathway enrichment analysis identified two significant pathways; degradation of  
446 aminobutyrate (GABA) degradation and degradation of 5- hydroxytryptamine  
447 (serotonin), to be significantly enriched in cluster III characterized by genes that  
448 progressively increased during entry into stationary phase (Fig 2). Genes involved, *e.g.*,  
449 *puuE*, *gabD*, *aldAB*, *feaB*, and *prr* increased their expression levels up to 10-fold at 4  
450 hours compared to 3 hours and increased further in the last sampling point at 5 hours.

451

452 The aminobutyrate degradation pathway (Fig 4) is linked to L-arginine and putrescine  
453 degradation pathways. Putrescine and its downstream metabolite spermidine are  
454 polyamines present in the gut and introduced by food, microbial, or intestinal cell  
455 metabolism [30]. They regulate cellular function in both prokaryotic and eukaryotic  
456 cells. The transient phase was characterized by upregulation of the *puu*-regulon.  
457 Putrescine is generated by decarboxylation of ornithine or decarboxylation of arginine  
458 into agmatine. *E. coli* uses specific importers such as PotFGHI and YdcU, members of  
459 the ATP-binding cassette (ABC) transporter family, and PuuP to take up putrescine  
460 across the cell membrane. Once putrescine is imported, PuuA  $\gamma$ -glutamylates putrescine  
461 resulting in a  $\gamma$ -glutamyl- $\gamma$ -aminobutyraldehyde, which is oxidized by PuuB and  
462 subsequently dehydrogenated by PuuC. Then, PuuD hydrolyzes the resultant  $\gamma$ -  
463 glutamyl group, generating and releasing simultaneously  $\gamma$ -aminobutyrate (GABA) and  
464 glutamate. PuuE deaminates GABA to succinic semialdehyde, which is oxidated by  
465 GabD (which does not belong to the *Puu* operon) to produce succinic acid that goes to  
466 the TCA metabolism [31-33].

467

468 In terms of virulence, polyamines, specifically, putrescine has been shown to be  
469 actively involved. For instance, a mutant of *potD* in *Streptococcus pneumoniae*  
470 displayed attenuated virulence. In *V. cholerae*, defective biofilm formation was  
471 observed after deletion of the homologous genes of *E. coli potD*. On the contrary,  
472 polyamines might prevent the colonization of the small intestine by *V. cholerae* since  
473 high concentrations of polyamines disrupt pili-pili interaction during autoaggregation  
474 [34]. In *Salmonella enterica* serovar Typhimurium, exogenous putrescine and  
475 spermidine are sensed to prime intracellular survival and induce virulence [35].

476

477 Interestingly, the downstream metabolite of putrescine  $\gamma$ -aminobutyric acid (GABA) is  
478 a well-known neurotransmitter used as food supplementation in animal husbandry to  
479 reduce aggressive behavior and stress [36]. Supplementation of GABA also induces  
480 sIgA secretion and increases IL-4 and IL-17 in piglets challenged with porcine ETEC  
481 [37]. The AraC-like transcription factor GadX is an activator of the glutamate  
482 decarboxylase *gadAB* that converts L-glutamate to GABA. GadX is also a repressor of  
483 the transcription factor that activates the expression of adhesion factor bundle forming  
484 pilus (*bfp*) and intimin in enteropathogenic *E. coli* [38, 39]. Hence factors that increase  
485 GABA might also downregulate virulence factors, and the corresponding rapid  
486 degradation of GABA at the transient phase could promote virulence and  
487 downregulated immune responses to ETEC. We could, however, not see the  
488 corresponding pattern in this study since adhesion factors CS5 and CS6 were not  
489 changed. Previous studies on transcriptomes in ETEC have indicated that toxin and CF  
490 genes are down-regulated upon binding to cells as well as influenced by bile salts  
491 present in the small intestine [11, 40, 41]. We have also previously shown that *eltAB*  
492 expression decreases from exponential to stationary growth phase [8].

493

494 Tryptophan is cleaved to indole, pyruvate, and  $\text{NH}_4^+$  by the tryptophanase (TnaA)  
495 enzyme expressed by certain bacteria, including *E. coli*, *Bacteroides* and  
496 *Lactobacilli*. Indole is an extracellular signaling molecule well known for affecting  
497 different aspects of bacterial physiology, including biofilm formation, in a  
498 concentration-dependent manner [42-45]. Indole is also an interspecies signaling  
499 molecule. In *E. coli*, the “indole peak” has been described in several studies as a short  
500 window of time at entry into the stationary phase where intracellular levels of indole

501 rapidly peak and then decrease again [42]. We found strong induction of *tnaA*  
502 expression at 4h compared to 3h and 5h and concomitant rapid decrease of intracellular  
503 L-tryptophan at 4h, supporting that the transient phase identified in this study is the  
504 same as the indole peak.

505

506 Tryptophan metabolism in the gut is important since tryptophan metabolites include  
507 indole and neurotransmitters and immunomodulators, including serotonin, tryptamine,  
508 and kynurenine. The synthesis of these latter molecules is performed in gut cells like  
509 enterochromaffin cells from diet-derived tryptophan and constitutes an important part  
510 of the gut-brain axis of neurotransmitters [46]. In this study, metabolomics identified  
511 L-5-hydroxytryptophan (5-HTP), the precursor of serotonin (5-hydroxytryptamine),  
512 and we also found L-kynurenine (Supplementary Table 6). To our knowledge, only one  
513 other study reported that *E. coli* could produce the neurotransmitter serotonin [47]. We  
514 performed an additional verification analysis (S Table 12) to search for serotonin in  
515 ETEC but were not able to detect it in our samples.

516 This study supports that commensal and pathogenic bacteria can both degrade and  
517 produce neurotransmitters and their intermediate molecules and hence ETEC infection  
518 might interact with gut cell signaling and influence the gut-brain axis to a larger extent  
519 than previously thought.

520

521 In summary, our data suggest that the entry into the stationary phase is a distinct growth  
522 phase that might pose ETEC into a stage of increased survival, virulence, and host  
523 competitiveness due to lack of need to sequester iron, retained virulence gene  
524 expression, and capacity to compete with the commensal flora for host-derived carbon  
525 and nitrogen sources such as fucose and putrescine. This study provides a framework  
526 for further studies on ETEC gene regulation and comprehensive characterization of  
527 transcriptional responses during the transition to the stationary phase that also applies  
528 to other bacteria.

529

## 530 **Materials and Methods**

531 *Strains, growth conditions, and bacterial enumeration.*

532 The ETEC strains E1777 and E2265 (LT STh/CS5+CS6), both isolated from adult  
533 patients with watery diarrhea in Dhaka Bangladesh in 2005 and 2006, respectively,

534 were used in this study [12, 48]. The whole-genome sequences of the two strains are  
535 available [18], including a complete assembled chromosome and two plasmids of 142  
536 and 78 kbp, respectively, for E2265 [11, 48]. Bacteria from frozen stock vials were  
537 grown on blood plates, and 10 colonies were picked and grown under shaking  
538 conditions in 10 ml of LB medium to  $OD_{600} = 0.8$  ( $10^9$  bacteria/ml) to be used as a  
539 starting culture. The starting culture was diluted 100-fold in 20 ml LB medium in a 250  
540 ml Erlenmeyer flask and grown aerated at 150 rpm rotation at 37 °C. Samples for optical  
541 density, colony-forming units (cfu), and RNA extraction and metabolomics were  
542 withdrawn after 3, 4, and 5 hours. For bacterial enumeration, the track dilution method  
543 was performed as described previously [49]. In brief, a 20  $\mu$ l of bacterial culture was  
544 collected every hour up to 6 h and overnight time point and subjected to ten-fold serial  
545 dilution in a 96-well plate filled with 180  $\mu$ l of phosphate-buffered saline (PBS) 1X. 10  
546  $\mu$ l from each dilution were spotted in a column onto LB agar plates, and the plate was  
547 tipped onto its side to allow migration of the spots across the agar surface. This step  
548 was performed in duplicate. LB plates were incubated overnight at 37°C, and cfu per  
549 ml was quantified by multiplying the number of colonies of each tract by their  
550 respective dilution factor and inoculated volume (0.01 ml).  
551 For RNA extraction, bacterial samples from 3, 4, and 5 h time points were immediately  
552 mixed with 2 x volume of RNAProtect<sup>®</sup> (Qiagen) using the manufacturer's protocol.  
553 Samples were stored at -80°C until extraction.  
554

#### 555 *RNA preparation*

556 Total RNA was prepared from lysozyme and proteinase K lysed bacteria using the  
557 RNeasy<sup>®</sup> Mini Kit (Qiagen, Hilden, Germany) and the instructions provided by the  
558 manufacturer for RNA extraction from Gram-negative bacteria. An extra step to  
559 remove contaminating DNA on-column was included using the RNase-Free DNase Set  
560 (Qiagen). The integrity of the RNA and absence of contaminating DNA was checked  
561 by agarose gel electrophoresis, and the RNA concentration was measured  
562 spectrophotometrically using a NanoDrop<sup>®</sup> ND-1000 (NanoDrop Technologies,  
563 Wilmington, DE). The RNA was carefully precipitated, washed, and shipped under  
564 99.5% EtOH. The integrity, quality, and concentrations of the RNA were rechecked  
565 upon arrival at the sequencing facility at Beijing Genome Institute (BGI), Shenzhen,  
566 China, using an Agilent. The RIN values were above 9.8 for all samples.

567

568 *RNA-seq*

569 The RNA samples were depleted from rRNA by RiboZero, and Illumina libraries were  
570 generated using the TruSeq protocol described by the manufacturer. The libraries were  
571 sequenced using the Hi-Seq 200 using a read length of 100 bp. Reads were assembled  
572 using the software SOAPdenovo (<http://soap.genomics.org.cn/soapdenovo.html>).  
573 CAP3 assembled all the unigenes from different samples to form a single set of non-  
574 redundant unigenes. All unigene sequences were blasted against protein databases  
575 using blastx (e-value<0.00001) in the following order: Nr SwissProt:KEGG:COG.  
576 Unigene sequences with hits in the first or second database did not go to the next search  
577 round against later databases. Then blast results were used to extract CDS from Unigene  
578 sequences and translate them into peptide sequences. Blast results information was also  
579 used to train ESTScan [50]. CDS of unigenes with no-hit in the blast were predicted by  
580 ESTScan and then translated into peptide sequences.

581 Functional annotations of Unigenes included protein sequence similarity, KEGG  
582 Pathway, COG, and Gene Ontology (GO) was performed. First, all-Unigene sequences  
583 were searched against protein databases (Nr SwissProt KEGG COG) using blastx (e-  
584 value<0.00001). Then, the Blast2GO program [51] was used to get GO annotations of  
585 the Unigenes. After getting GO annotation for every Unigene, we used WEGO software  
586 [52] to do GO functional classification for all Unigenes.

587 Each time point's differential expression was determined using the DESeq2 package  
588 (v1.22.1) and R-3.6.0 [53]. The counts were normalized, and the fold change and the  
589 log<sub>2</sub> of the fold-change were calculated based on the following comparisons: control  
590 (3 h) vs. 4 h and control vs. 5 h. Significant genes from each comparison and each strain  
591 were filtrated using the following threshold: Padj < 0.05, log<sub>2</sub>Foldchange < -2 and  
592 log<sub>2</sub>foldchange > 2. PCA and sample distance heatmaps were plotted to visualize the  
593 cluster of groups and outliers. Heatmaps of differential genes were generated using the  
594 R package *pheatmap* [54]. For temporal gene expression pattern analysis, the Short  
595 time-series Expression miner (STEM) was applied as described by Ernst, Nau [17]. For  
596 gene ontology (GO) enrichment analysis for biological processes and metabolic  
597 pathways, PATHER Overrepresentaton Test (<http://www.pantherdb.org/>) [55] with an  
598 FDR correction applied to all reported P values for the statistical tests.

599

600 *Untargeted Metabolomics*

601 *Bacterial sampling*

602 The bacterial sampling for metabolomics was performed as described previously [56]  
603 with some modifications. A total of 4 ml of bacterial culture were collected and split  
604 into two sterile Eppendorf tubes to sample intracellular and secreted metabolites at  
605 every time point. In addition, another 100  $\mu$ l were collected for measurement of the  
606 optical density and pH. For extracellular metabolites, 2 ml of bacterial culture was  
607 pelleted by centrifugation at 12,000 x g for 3 min a tabletop centrifuge, and the  
608 supernatants were carefully removed and transferred to a new sterile Eppendorf tube  
609 for snap-freezing in liquid nitrogen. Snap frozen samples were stored at -80°C. The fast  
610 filtration method was applied for intracellular metabolites using a 3-place EZ-Fit™  
611 Manifold (Millipore®) connected to a single vacuum that supports simultaneous  
612 filtration of three samples. A sterile 22 mm diameter MF-Millipore® membrane filter  
613 with 0.45- $\mu$ m pore size was placed onto each manifold, pre-washed with pre-warmed  
614 LB medium, and the vacuum set to 50 mbar. 2 ml of the bacterial culture were pipetted  
615 in the middle of the filter and subsequently perfused with 5 ml of pre-warmed washing  
616 buffer (M9 medium [Sigma-Aldrich] adjusted to pH 7.3) was perfused. Immediately  
617 after, the cell-loaded filter was removed and transferred to an Eppendorf tube for snap-  
618 freezing in liquid nitrogen. 2 ml aliquots of LB and M9 minimal medium (Sigma-  
619 Aldrich) were collected and snap-frozen and used as negative controls. All tubes were  
620 kept at -80°C and shipped in dry ice to the Science for Life Laboratory at Uppsala  
621 University for metabolite extraction and UPLC-MS analysis.

622

623 *Metabolite Extraction*

624 Supernatants were extracted by the addition of 4 mL of 60:40 ethanol: water solution.  
625 The mixture was kept at 78 °C for 3 min, with vigorous mixing every minute. The filters  
626 containing the bacterial pellet were transferred to a 4 ml solution and kept at 78 °C for  
627 3 min, with vigorous mixing every minute. The samples were transferred to Eppendorf  
628 tubes on ice and centrifuged at 13500 rpm for 5 min, at 4 °C. The supernatant was  
629 collected and dried under vacuum on a Speedvac concentrator. The pellet was re-  
630 dissolved and injected onto the UPLC-MS system.

631

632 *UPLC-MS Analysis*

633 Ultra-high-performance liquid chromatography coupled to a mass spectrometer  
634 (UPLC-MS) was used to identify metabolites, which differ between the three different  
635 time points. Mass spectrometric analysis was performed on an Acquity UPLC system  
636 connected to a Synapt G2 Q-TOF mass spectrometer, both from Waters Corporation  
637 (Milford, MA, USA). The system was controlled using the MassLynx software package  
638 v 4.1, also from Waters. The separation was performed on an Acquity UPLC® HSS T3  
639 column (1.8  $\mu\text{m}$ , 100  $\times$  2.1 mm) from Waters Corporation. The mobile phase consisted  
640 of 0.1% formic acid in MilliQ water (A) and 0.1% formic acid in LC-MS grade  
641 methanol (B). The column temperature was 40 °C and the mobile phase gradient  
642 applied was as follows: 0-2 min, 0% B; 2-15 min, 0-100 % B; 15-18 min, 100 % B; 18-  
643 20 min, 100-0 % B; 20-25 min, 0 % B, with a flow rate of 0.3 ml/min.

644 The samples were introduced into the q-TOF using positive electrospray ionization.  
645 The capillary voltage was set to 2.50 kV and the cone voltage was 40 V. The source  
646 temperature was 100 °C, the cone gas flow 50 l/min, and the desolvation gas flow 600  
647 l/h. The instrument was operated in MSE mode, the scan range was  $m/z = 50-1200$ , and  
648 the scan time was 0.3 s. A solution of sodium formate (0.5 mM in 2-propanol: water,  
649 90:10, v/v) was used to calibrate the instrument, and a solution of leucine-enkephalin  
650 (2 ng/ $\mu\text{l}$  in acetonitrile: 0.1% formic acid in the water, 50:50, v/v) was used for the lock  
651 mass correction at an injection rate of 30 s.

652

### 653 *Data analysis*

654 The obtained UPLC-MS data comparing the different time points were analyzed using  
655 the XCMS software package under R (version 3.3.0) to perform peak detection,  
656 alignment, peak filling, and integration. The peaks were annotated by comparing their  
657  $m/z$  values to the exact molecular masses of all the online platform Metaboanalyst for  
658 pathway analysis. The *Escherichia coli* K-12 MG1655 from the KEGG database was  
659 used for metabolite identification. Confirmed metabolites were co-injected with the  
660 bacterial samples for the highest level of confirmation. The structures for the  
661 significantly altered metabolites were validated with authentic internal standards, as  
662 detailed in Figure S12. PCA and heatmaps were performed in R software. The  
663 metabolite-metabolite correlations were computed using the R function *rcorr* from the  
664 Hmisc package (<https://cran.r-project.org/web/packages/Hmisc/index.html>). A  
665 multiple parametric statistic t-test was performed in GraphPad to compare the means

666 of two paired groups, *i.e.*, 3 h vs. 4 h, and multiple comparison corrections were applied  
667 using the Holm-Šidák method. *P-value* < 0.05 was set as the threshold for significance.

668

## 669 Acknowledgments

670 The study was supported by the Swedish Research Council (dnr 2011-2435, dnr 2014-  
671 02639, dnr 2017-01812, and dnr 2020-01941), VINNOVA (2011-03491), and the  
672 Swedish Foundation for Strategic Research, SSF (SB12-0072) to ÅS. This study was  
673 also supported by the Swedish Research Council (dnr 2016-04423) and a generous  
674 start-up grant from the Science for Life Laboratory to DG. I.N. is partially supported  
675 by the National Institute of General Medical Sciences of the National Institutes of  
676 Health (award P20GM125503). Finally, the authors wish to express their gratitude to  
677 the Beijing Genome Institute (BGI) staff, Shenzhen, China, for Illumina sequencing.

678

679

## 680 References

681

- 682 1. Nataro, J.P. and J.B. Kaper, *Diarrheagenic Escherichia coli*. Clin Microbiol Rev, 1998. **11**(1):  
683 p. 142-201.
- 684 2. Turner, S.M., et al., *Phylogenetic Comparisons Reveal Multiple Acquisitions of the Toxin*  
685 *Genes by Enterotoxigenic Escherichia coli Strains of Different Evolutionary Lineages*. Journal  
686 of Clinical Microbiology, 2006. **44**(12): p. 4528-4536.
- 687 3. Hazen, T.H., et al., *Draft Genome Sequences of Three O157 Enteropathogenic Escherichia*  
688 *coli Isolates*. Genome Announc, 2013. **1**(4).
- 689 4. von Mentzer, A., et al., *Identification of enterotoxigenic Escherichia coli (ETEC) clades with*  
690 *long-term global distribution*. Nat Genet, 2014. **46**(12): p. 1321-6.
- 691 5. Gaastra, W. and A.M. Svennerholm, *Colonization factors of human enterotoxigenic*  
692 *Escherichia coli (ETEC)*. Trends Microbiol, 1996. **4**(11): p. 444-52.
- 693 6. Qadri, F., et al., *Enterotoxigenic Escherichia coli in developing countries: epidemiology,*  
694 *microbiology, clinical features, treatment, and prevention*. Clin Microbiol Rev, 2005. **18**(3):  
695 p. 465-83.
- 696 7. Bodero, M.D. and G.P. Munson, *Cyclic AMP Receptor Protein-Dependent Repression of*  
697 *Heat-Labile Enterotoxin*. Infection and Immunity, 2009. **77**(2): p. 791-798.
- 698 8. Gonzales, L., et al., *Alkaline pH Is a signal for optimal production and secretion of the heat*  
699 *labile toxin, LT in enterotoxigenic Escherichia coli (ETEC)*. PLoS One, 2013. **8**(9): p. e74069.
- 700 9. Haycocks, J.R.J., et al., *The Molecular Basis for Control of ETEC Enterotoxin Expression in*  
701 *Response to Environment and Host*. PLoS Pathogens, 2015. **11**(1): p. e1004605.
- 702 10. Hodson, C., et al., *Control of Virulence Gene Expression by the Master Regulator, CfaD, in*  
703 *the Prototypical Enterotoxigenic Escherichia coli Strain, H10407*. Frontiers in Microbiology,  
704 2017. **8**(1525).
- 705 11. Joffre, E., et al., *The bile salt glycocholate induces global changes in gene and protein*  
706 *expression and activates virulence in enterotoxigenic Escherichia coli*. Scientific Reports,  
707 2019. **9**(1): p. 108.
- 708 12. Nicklasson, M., et al., *Expression of colonization factor CS5 of enterotoxigenic Escherichia*  
709 *coli (ETEC) is enhanced in vivo and by the bile component Na glycocholate hydrate*. PLoS  
710 One, 2012. **7**(4): p. e35827.
- 711 13. Sahl, J.W., et al., *A comparative genomic analysis of diverse clonal types of enterotoxigenic*  
712 *Escherichia coli reveals pathovar-specific conservation*. Infect Immun, 2011. **79**(2): p. 950-  
713 60.



- 714 14. Hazen, T.H., et al., *Genome and Functional Characterization of Colonization Factor Antigen*  
715 *I- and CS6-Encoding Heat-Stable Enterotoxin-Only Enterotoxigenic <i>Escherichia coli</i>*  
716 *Reveals Lineage and Geographic Variation.* mSystems, 2019. **4**(1): p. e00329-18.
- 717 15. Crofts, A.A., et al., *Enterotoxigenic <em>E. coli</em> virulence gene regulation in human*  
718 *infections.* Proceedings of the National Academy of Sciences, 2018. **115**(38): p. E8968-  
719 E8976.
- 720 16. Sezonov, G., D. Joseleau-Petit, and R. D'Ari, *Escherichia coli physiology in Luria-Bertani*  
721 *broth.* J Bacteriol, 2007. **189**(23): p. 8746-9.
- 722 17. Ernst, J., G.J. Nau, and Z. Bar-Joseph, *Clustering short time series gene expression data.*  
723 *Bioinformatics*, 2005. **21 Suppl 1**: p. i159-68.
- 724 18. Liu, F., et al., *Draft genomes of four enterotoxigenic Escherichia coli (ETEC) clinical isolates*  
725 *from China and Bangladesh.* Gut Pathog, 2015. **7**: p. 10.
- 726 19. Feehily, C. and K.A.G. Karatzas, *Role of glutamate metabolism in bacterial responses*  
727 *towards acid and other stresses.* Journal of Applied Microbiology, 2013. **114**(1): p. 11-24.
- 728 20. Martinez-Antonio, A., et al., *Regulatory design governing progression of population growth*  
729 *phases in bacteria.* PLoS One, 2012. **7**(2): p. e30654.
- 730 21. Thompson, L.J., et al., *Gene expression profiling of Helicobacter pylori reveals a growth-*  
731 *phase-dependent switch in virulence gene expression.* Infect Immun, 2003. **71**(5): p. 2643-55.
- 732 22. Holden, V.I. and M.A. Bachman, *Diverging roles of bacterial siderophores during infection.*  
733 *Metallomics*, 2015.
- 734 23. Andrews, S.C., A.K. Robinson, and F. Rodriguez-Quinones, *Bacterial iron homeostasis.*  
735 *FEMS Microbiol Rev*, 2003. **27**(2-3): p. 215-37.
- 736 24. Saha, R., et al., *Microbial siderophores: a mini review.* J Basic Microbiol, 2013. **53**(4): p.  
737 303-17.
- 738 25. Kamada, N., et al., *Control of pathogens and pathobionts by the gut microbiota.* Nat  
739 Immunol, 2013. **14**(7): p. 685-90.
- 740 26. Hooper, L.V., et al., *A molecular sensor that allows a gut commensal to control its nutrient*  
741 *foundation in a competitive ecosystem.* Proc Natl Acad Sci U S A, 1999. **96**(17): p. 9833-8.
- 742 27. Ng, K.M., et al., *Microbiota-liberated host sugars facilitate post-antibiotic expansion of*  
743 *enteric pathogens.* Nature, 2013. **502**(7469): p. 96-9.
- 744 28. Pacheco, A.R., et al., *Fucose sensing regulates bacterial intestinal colonization.* Nature, 2012.  
745 **492**(7427): p. 113-7.
- 746 29. Fabich, A.J., et al., *Comparison of carbon nutrition for pathogenic and commensal*  
747 *Escherichia coli strains in the mouse intestine.* Infect Immun, 2008. **76**(3): p. 1143-52.
- 748 30. Tofalo, R., S. Cocchi, and G. Suzzi, *Polyamines and Gut Microbiota.* Frontiers in nutrition,  
749 2019. **6**: p. 16-16.
- 750 31. Nemoto, N., et al., *Mechanism for regulation of the putrescine utilization pathway by the*  
751 *transcription factor PuuR in Escherichia coli K-12.* J Bacteriol, 2012. **194**(13): p. 3437-47.
- 752 32. Schneider, B.L., V.J. Hernandez, and L. Reitzer, *Putrescine catabolism is a metabolic*  
753 *response to several stresses in Escherichia coli.* Mol Microbiol, 2013. **88**(3): p. 537-50.
- 754 33. Kurihara, S., et al., *A novel putrescine utilization pathway involves gamma-glutamylated*  
755 *intermediates of Escherichia coli K-12.* J Biol Chem, 2005. **280**(6): p. 4602-8.
- 756 34. Goforth, J.B., N.E. Walter, and E. Karatan, *Effects of Polyamines on Vibrio cholerae*  
757 *Virulence Properties.* PLoS ONE, 2013. **8**(4): p. e60765.
- 758 35. Jelsbak, L., et al., *Polyamines Are Required for Virulence in <italic>Salmonella*  
759 *enterica</italic> Serovar Typhimurium.* PLoS ONE, 2012. **7**(4): p. e36149.
- 760 36. H., L.Y., et al., *Effect of gamma-aminobutyric acid on growth performance, behavior and plasma*  
761 *hormones in weaned pigs.* Canadian Journal of Animal Science, 2015. **95**(2): p. 165-171.
- 762 37. Zhao, Y., et al., *Effects of GABA Supplementation on Intestinal SIgA Secretion and Gut*  
763 *Microbiota in the Healthy and ETEC-Infected Weanling Piglets.* Mediators Inflamm, 2020.  
764 **2020**: p. 7368483.
- 765 38. Shin, S., et al., *An activator of glutamate decarboxylase genes regulates the expression of*  
766 *enteropathogenic Escherichia coli virulence genes through control of the plasmid-encoded*  
767 *regulator, Per.* Mol Microbiol, 2001. **41**(5): p. 1133-50.
- 768 39. Braun, H.S., et al., *The GadX regulon affects virulence gene expression and adhesion of*  
769 *porcine enteropathogenic Escherichia coli in vitro.* Vet Anim Sci, 2017. **3**: p. 10-17.
- 770 40. Kansal, R., et al., *Transcriptional modulation of enterotoxigenic Escherichia coli virulence*  
771 *genes in response to epithelial cell interactions.* Infect Immun, 2013. **81**(1): p. 259-70.

- 772 41. Joffré, E., et al., *Identification of new heat-stable (STa) enterotoxin allele variants produced*  
773 *by human enterotoxigenic Escherichia coli (ETEC)*. *Int J Med Microbiol*, 2016. **306**(7): p.  
774 586-594.
- 775 42. Gaimster, H., et al., *The indole pulse: a new perspective on indole signalling in Escherichia*  
776 *coli*. *PLoS One*, 2014. **9**(4): p. e93168.
- 777 43. Bansal, T., et al., *The bacterial signal indole increases epithelial-cell tight-junction resistance*  
778 *and attenuates indicators of inflammation*. *Proc Natl Acad Sci U S A*, 2010. **107**(1): p. 228-  
779 33.
- 780 44. Lee, J., A. Jayaraman, and T.K. Wood, *Indole is an inter-species biofilm signal mediated by*  
781 *SdiA*. *BMC Microbiol*, 2007. **7**: p. 42.
- 782 45. Li, G. and K.D. Young, *Indole production by the tryptophanase TnaA in Escherichia coli is*  
783 *determined by the amount of exogenous tryptophan*. *Microbiology*, 2013. **159**(Pt 2): p. 402-  
784 10.
- 785 46. O'Mahony, S.M., et al., *Serotonin, tryptophan metabolism and the brain-gut-microbiome axis*.  
786 *Behav Brain Res*, 2015. **277**: p. 32-48.
- 787 47. Shishov, V.A., et al., *Amine neuromediators, their precursors, and oxidation products in the*  
788 *culture of Escherichia coli K-12*. *Applied Biochemistry and Microbiology*, 2009. **45**(5): p.  
789 494-497.
- 790 48. Begum, Y.A., et al., *In Situ Analyses Directly in Diarrheal Stool Reveal Large Variations in*  
791 *Bacterial Load and Active Toxin Expression of Enterotoxigenic Escherichiacoli and Vibrio*  
792 *cholerae*. *mSphere*, 2018. **3**(1).
- 793 49. Jett, B.D., et al., *Simplified agar plate method for quantifying viable bacteria*. *Biotechniques*,  
794 1997. **23**(4): p. 648-50.
- 795 50. Iseli, C., C.V. Jongeneel, and P. Bucher, *ESTScan: a program for detecting, evaluating, and*  
796 *reconstructing potential coding regions in EST sequences*. *Proc Int Conf Intell Syst Mol Biol*,  
797 1999: p. 138-48.
- 798 51. Conesa, A., et al., *Blast2GO: a universal tool for annotation, visualization and analysis in*  
799 *functional genomics research*. *Bioinformatics*, 2005. **21**(18): p. 3674-6.
- 800 52. Ye, J., et al., *WEGO: a web tool for plotting GO annotations*. *Nucleic Acids Res*, 2006.  
801 **34**(Web Server issue): p. W293-7.
- 802 53. Love, M.I., W. Huber, and S. Anders, *Moderated estimation of fold change and dispersion for*  
803 *RNA-seq data with DESeq2*. *Genome Biology*, 2014. **15**(12): p. 550.
- 804 54. Kolde, R., *heatmap: Pretty Heatmaps*. *R package version 0.7. 7*. 2013.
- 805 55. Mi, H. and P. Thomas, *PANTHER pathway: an ontology-based pathway database coupled*  
806 *with data analysis tools*. *Methods in molecular biology (Clifton, N.J.)*, 2009. **563**: p. 123-140.
- 807 56. Link, H., J.M. Buescher, and U. Sauer, *Chapter 5 - Targeted and quantitative metabolomics in*  
808 *bacteria*, in *Methods in Microbiology*, C. Harwood and A. Wipat, Editors. 2012, Academic  
809 Press. p. 127-150.
- 810

811  
812

## Supplementary Figures

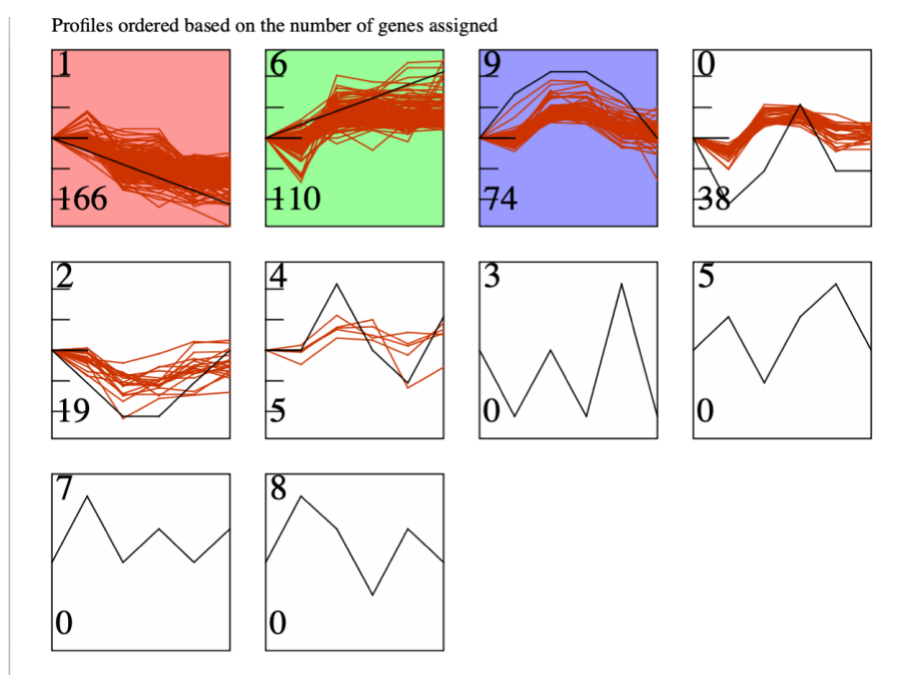

813  
814  
815  
816  
817  
818

**S Figure 1.** Identified gene expression patterns by STEM. The profile number on the top left corner of each profile box was assigned by STEM and the number on the bottom left represents the number of genes included in the cluster. Clusters with a  $p$ -value  $>0.05$  were colored.

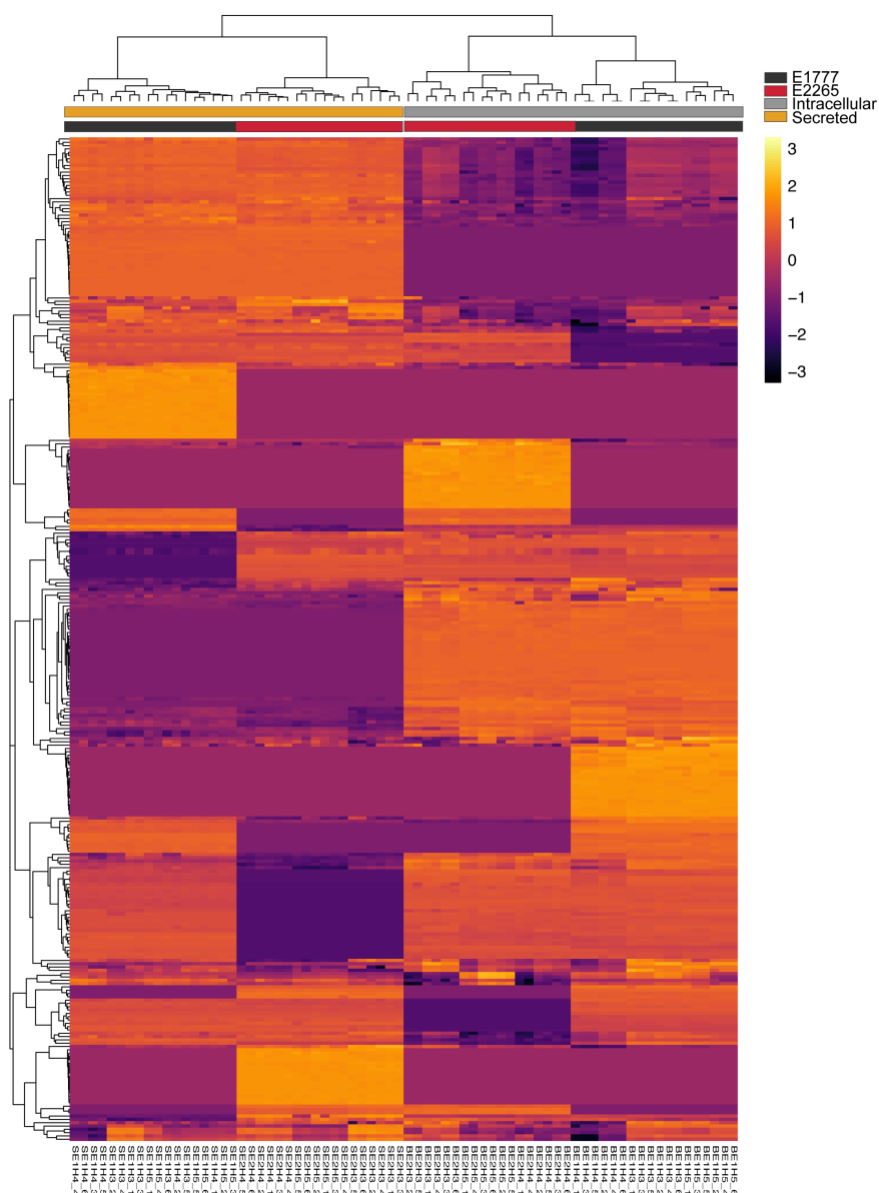

819  
820  
821

**S Figure 2.** Heatmap representation of the abundance of 288 intracellular and secreted metabolites detected in E2265 and E1777.

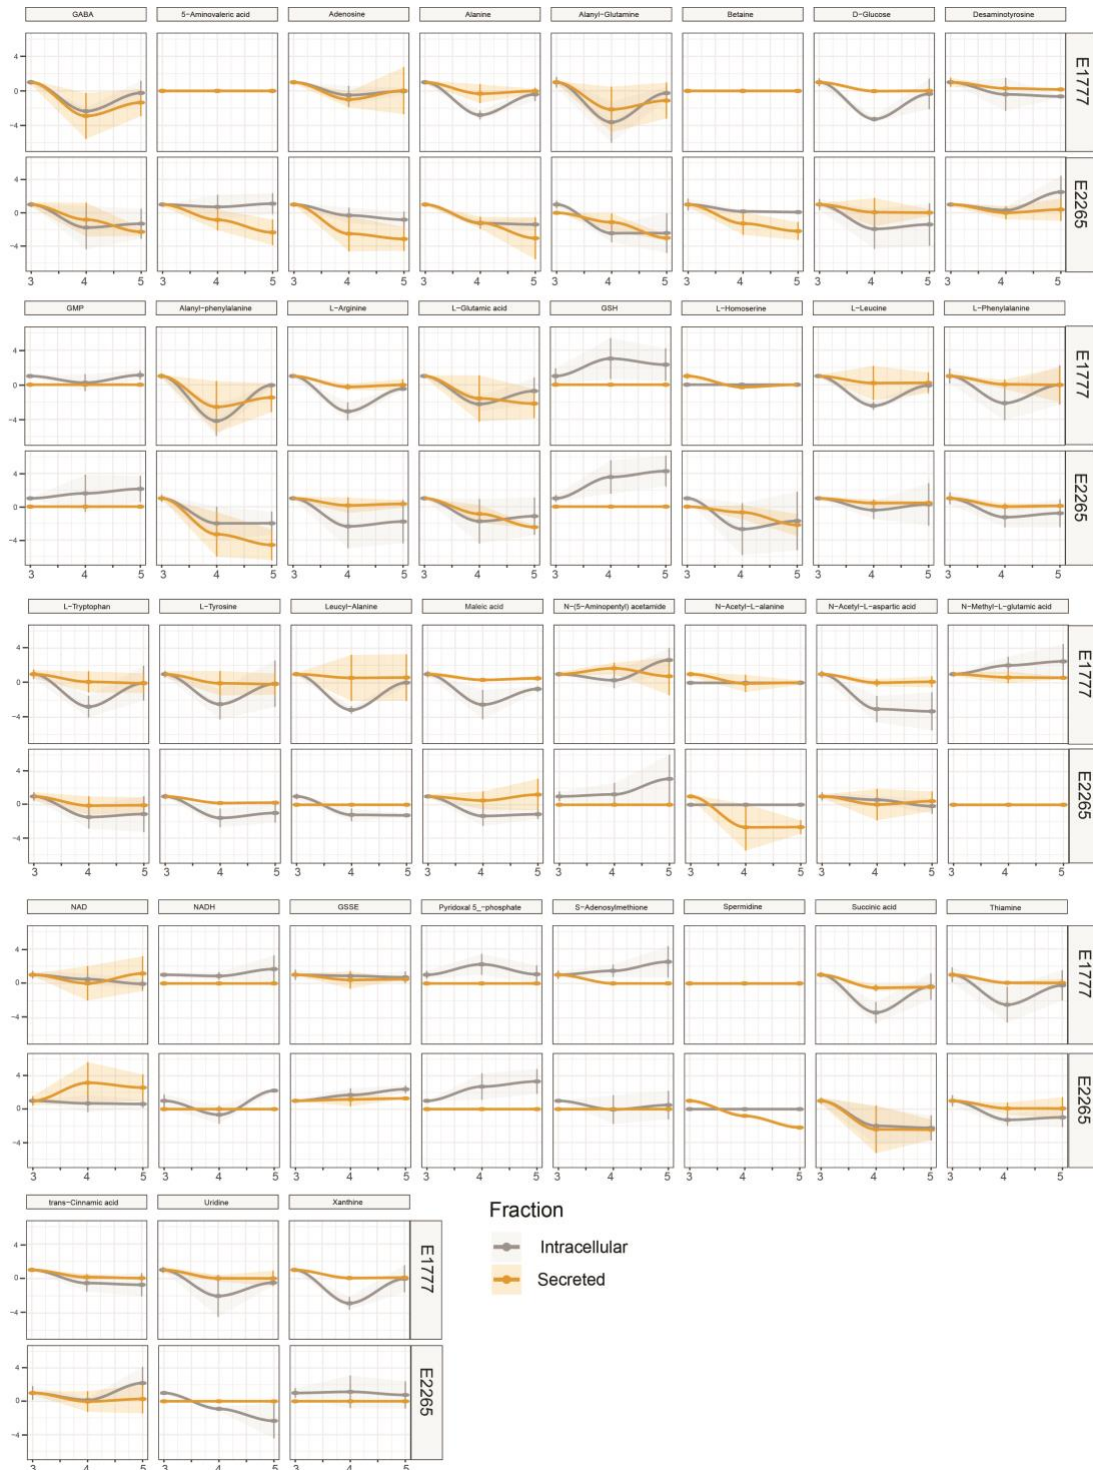

822

823

**S Figure 3.** Data of the concentration of all significant metabolites are represented in

824

the serial charts. The metabolite concentration is adjusted to 3 h, and the data is

825

presented in fold-change  $\pm$  SD.

826

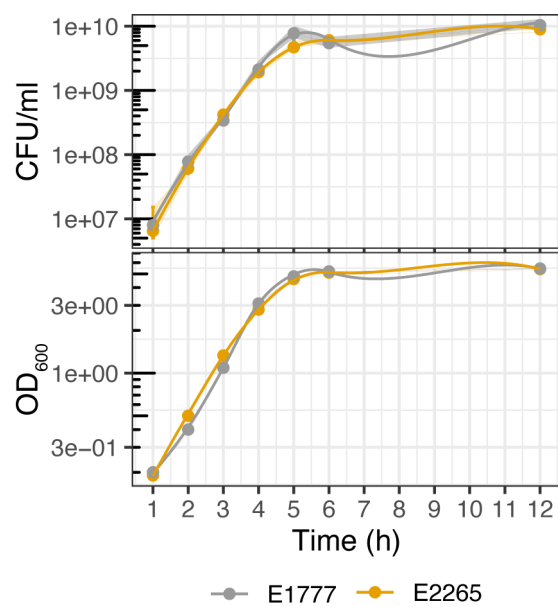

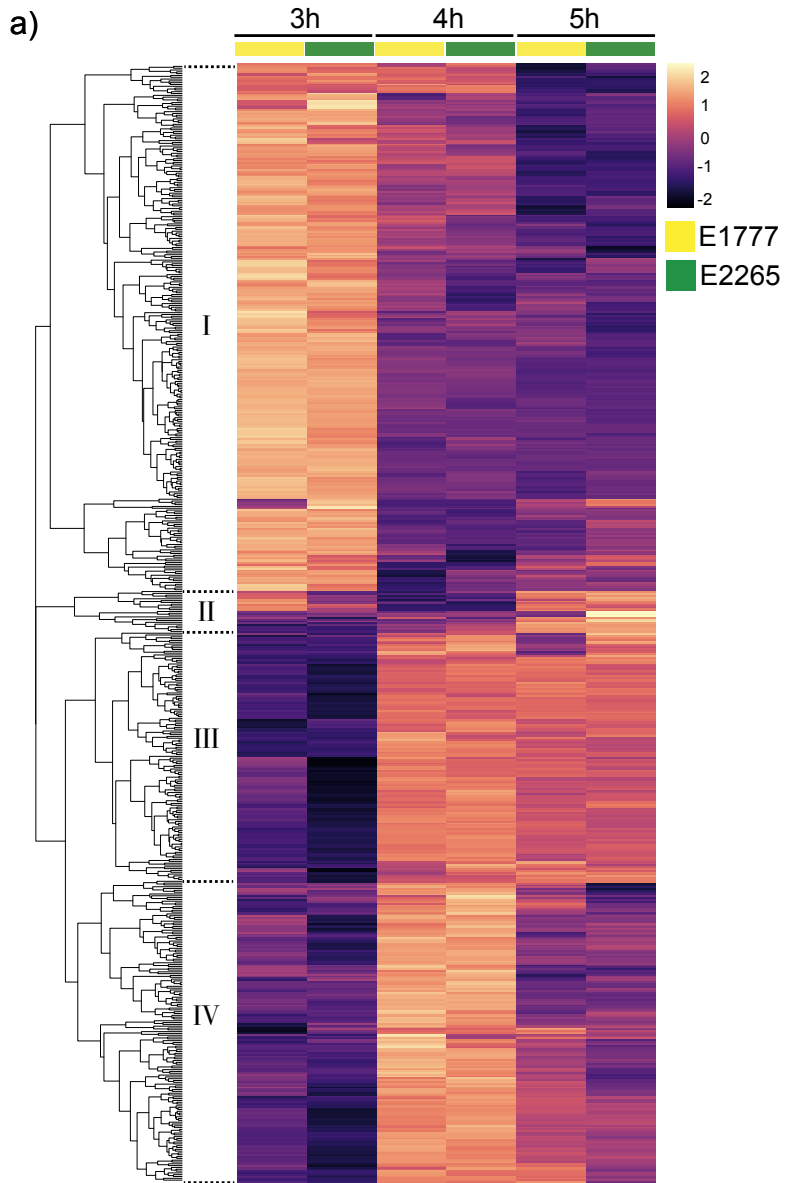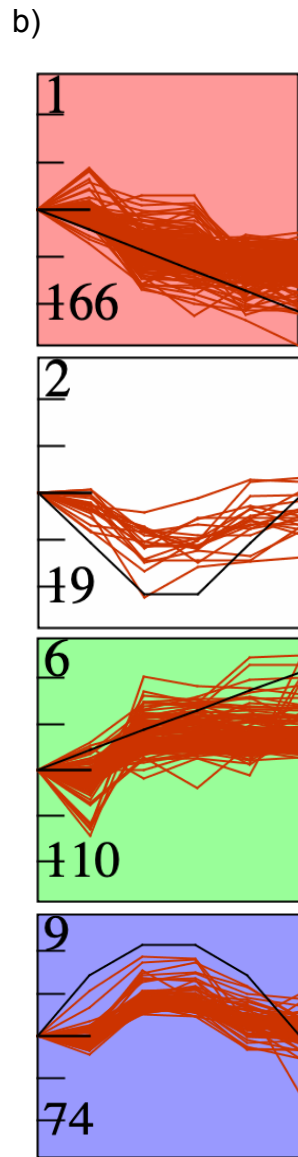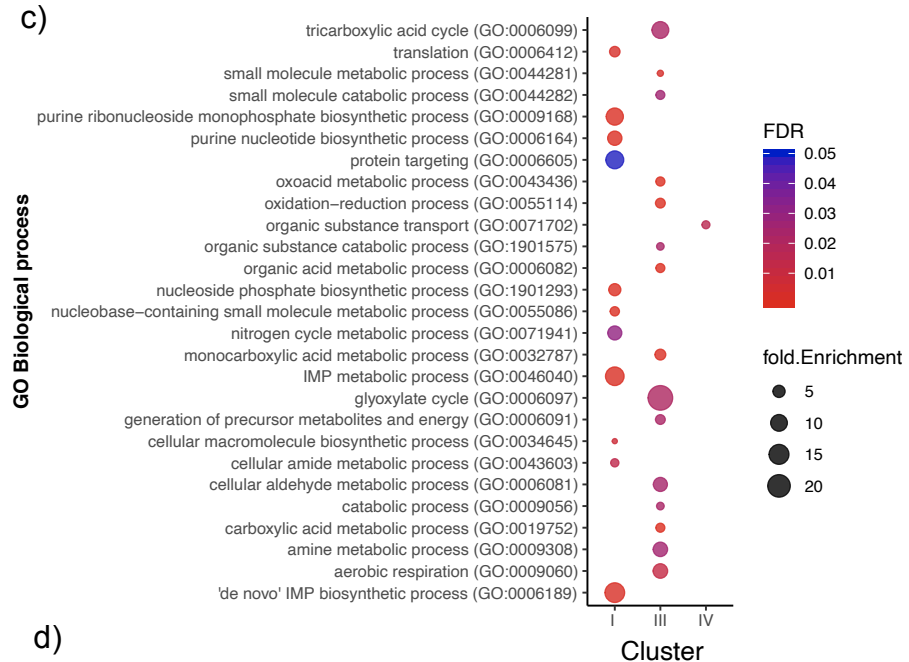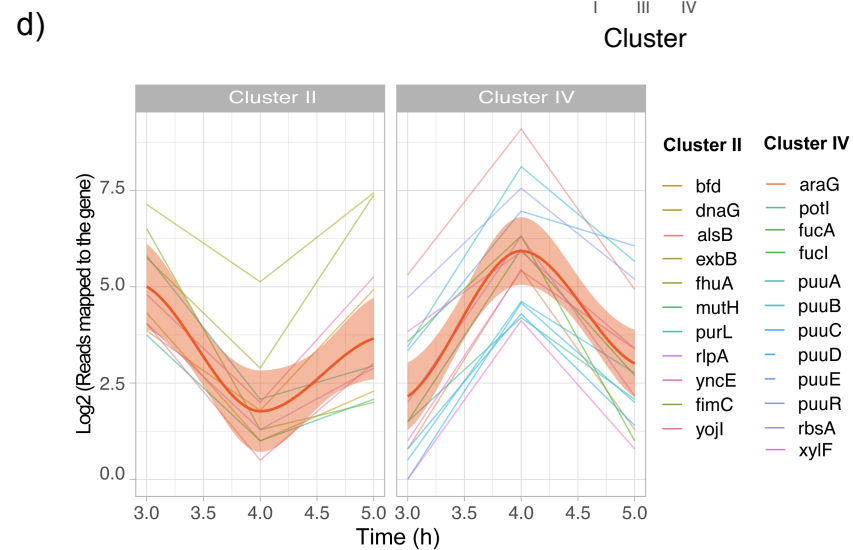

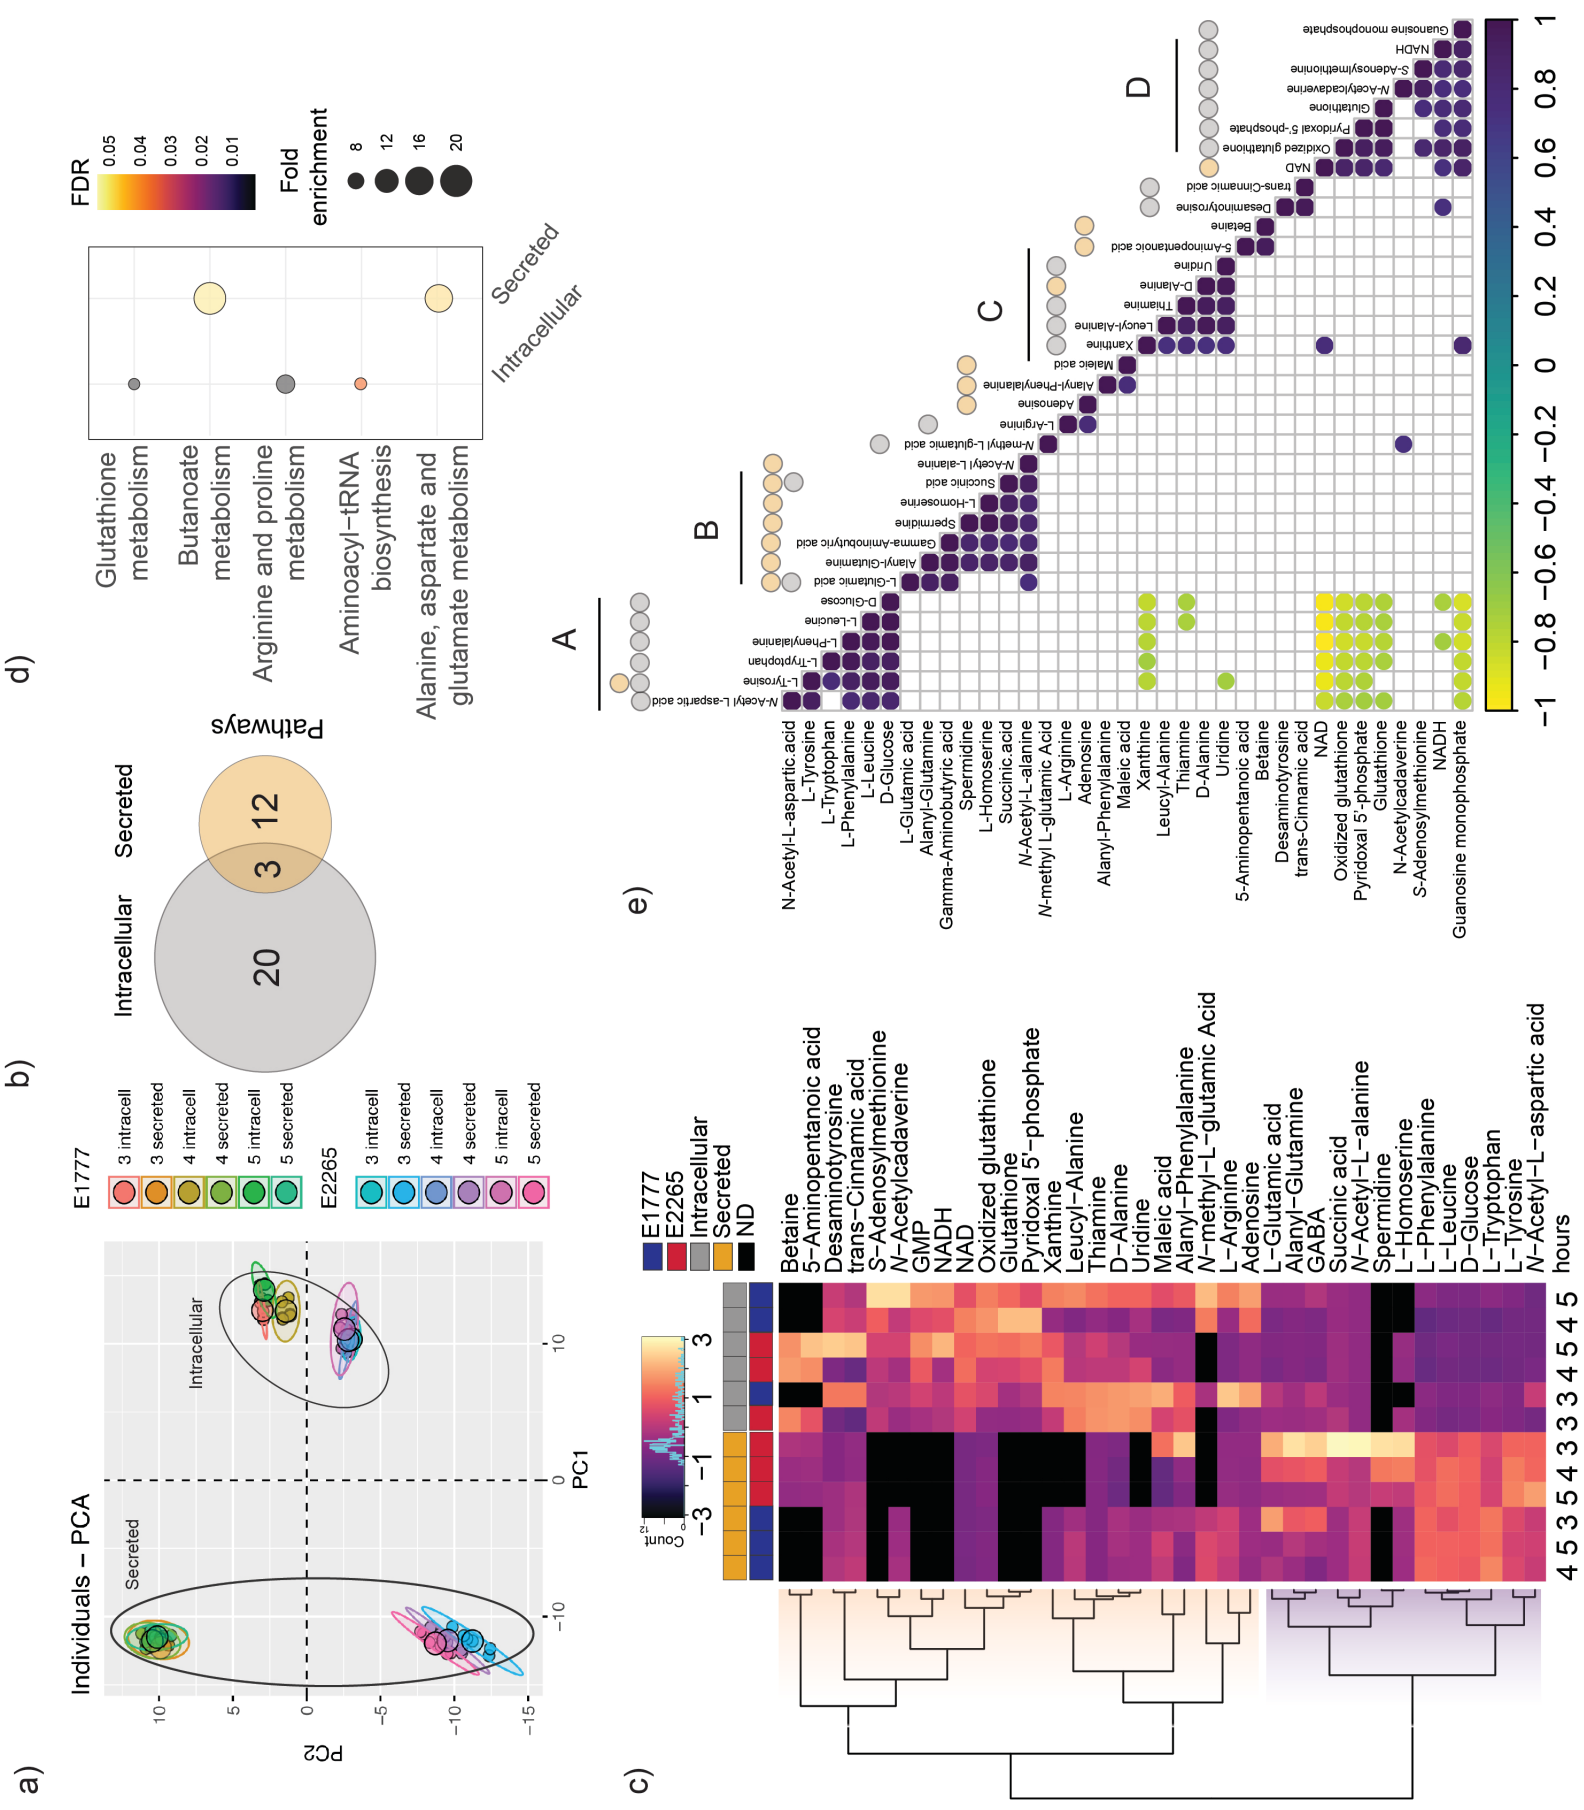



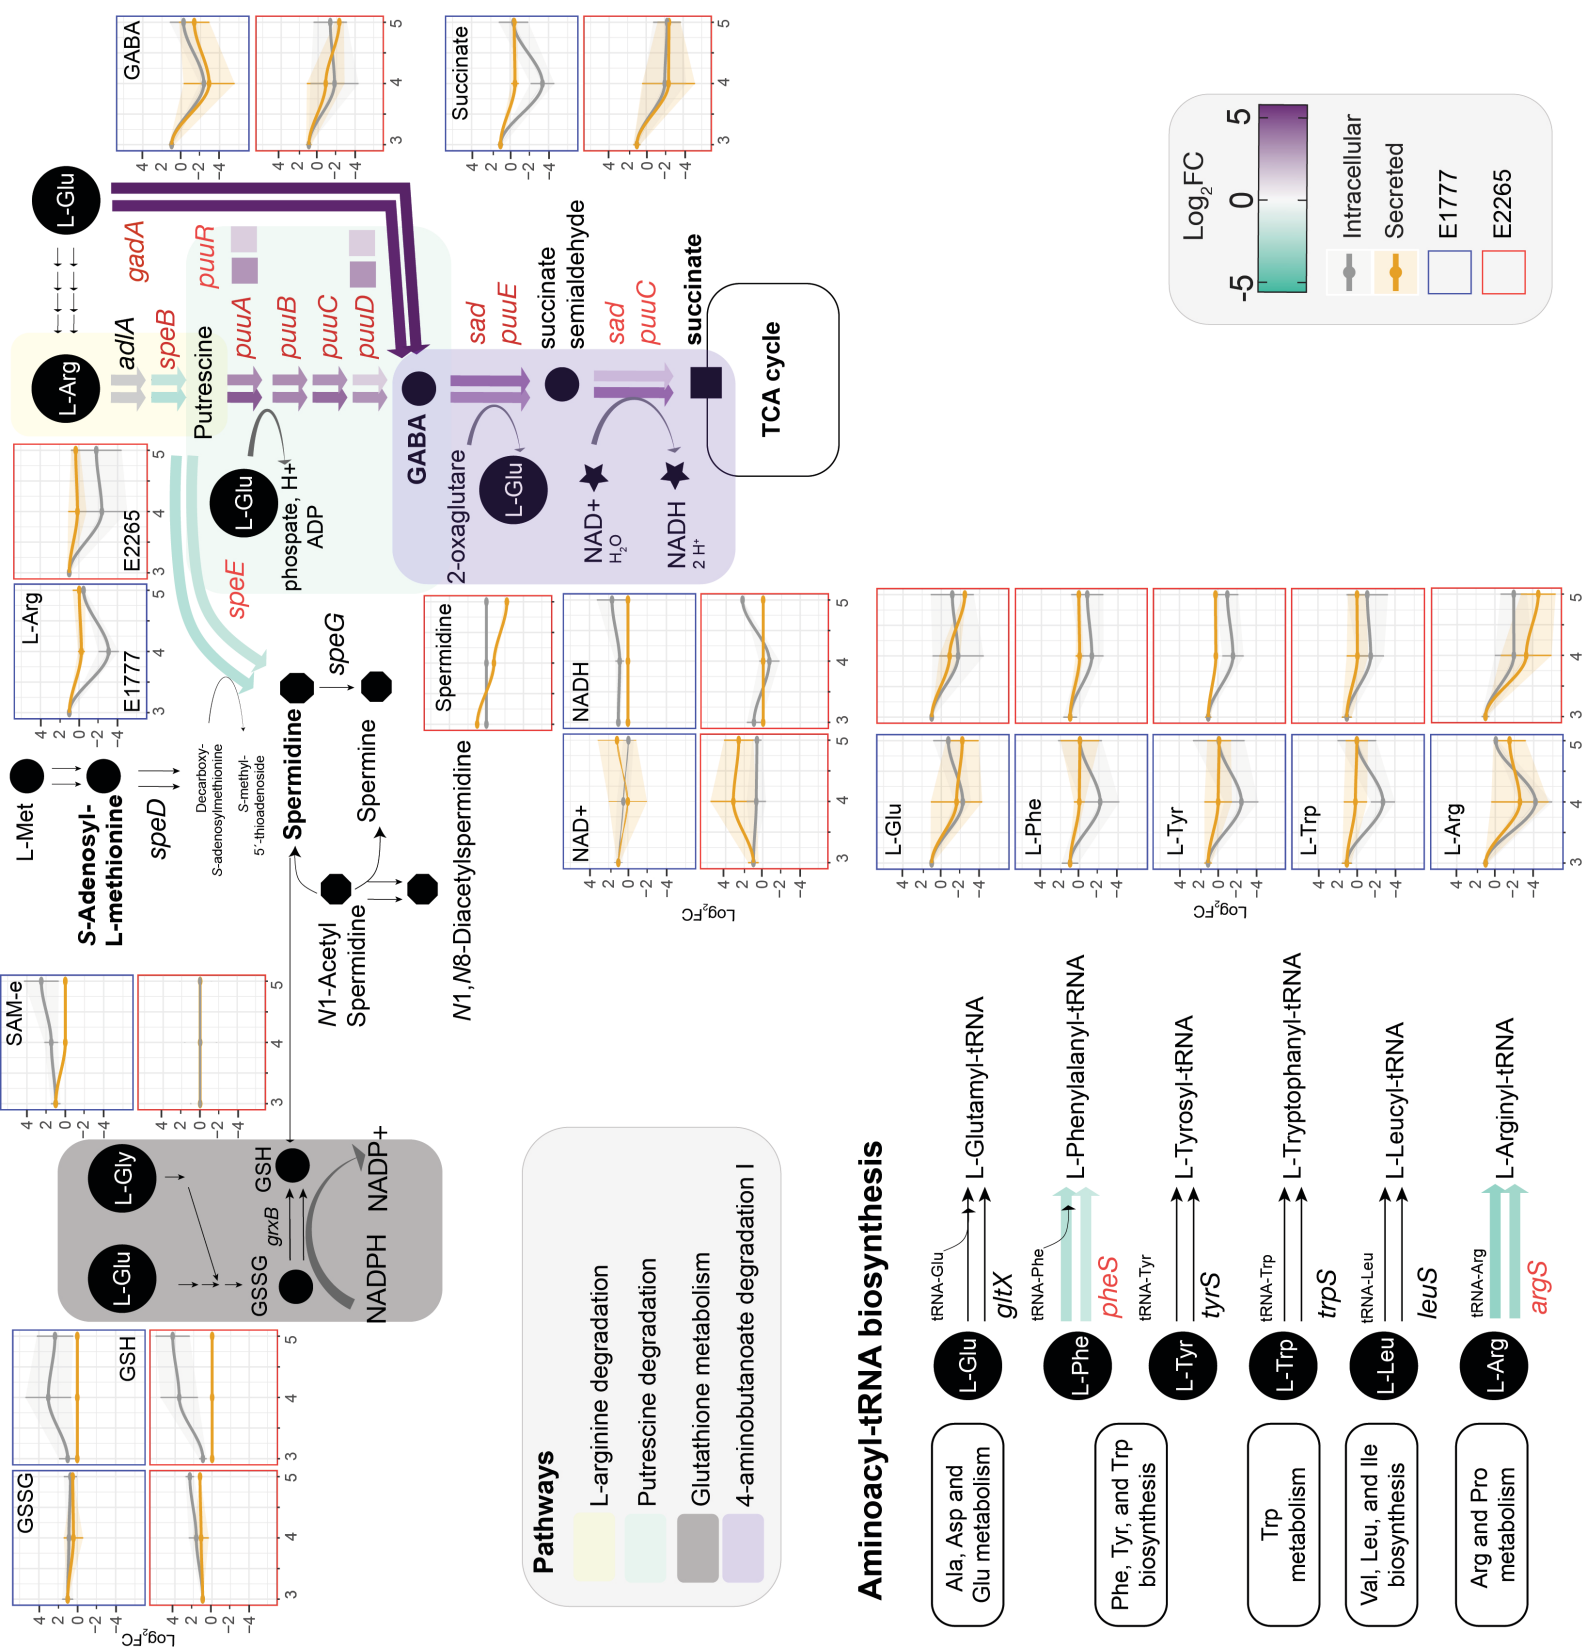

Source: https://www.biorxiv.org/content/biorxiv/early/2021/08/26/2021.08.24.457600.full.pdf
